# 1 Higher frequency of interstate over international transmission chains of SARS- 2 CoV-2 virus at the Rio Grande do Sul - Brazil state borders

3

4 Filipe Zimmer Dezordi<sup>1,2\*</sup>, José Valter Joaquim Silva Júnior<sup>3,4,5,6,7\*</sup>, Terimar Facin Ruoso<sup>8\*</sup>, Angela  
5 Giovana Batista<sup>8,9</sup>, Pedro Mesquita Fonseca<sup>8</sup>, Richard Steiner Salvato<sup>10</sup>, Tatiana Schäffer Gregianini<sup>10</sup>,  
6 Thaísa Regina Rocha Lopes<sup>3,7</sup>, Eduardo Furtado Flores<sup>3</sup>, Rudi Weiblen<sup>3</sup>, Patrícia Chaves Brites<sup>11</sup>,  
7 Mônica de Medeiros Silva<sup>12</sup>, João Batista Teixeira da Rocha<sup>12</sup>, Gustavo de Lima Barbosa<sup>13</sup>, Lais  
8 Ceschini Machado<sup>1</sup>, Alexandre Freitas da Silva<sup>1,2</sup>, Marcelo Henrique Santos Paiva<sup>1,14</sup>, Matheus  
9 Filgueira Bezerra<sup>15</sup>, Tulio de Lima Campos<sup>2</sup>, Tiago Gräf<sup>16</sup>, Daniel Angelo Sganzerla Graichen<sup>17&</sup>, Elgion  
10 Lucio da Silva Loreto<sup>12&</sup>, Gabriel da Luz Wallau<sup>1,2,18&</sup> on behalf of the Fiocruz Genomic Network

11 \* Equal contribution

12 & Equal contribution

13 <sup>1</sup>Departamento de Entomologia, Instituto Aggeu Magalhães (IAM)-Fundação Oswaldo Cruz-FIOCRUZ, Recife  
14 50670-420, Brazil

15 <sup>2</sup>Núcleo de Bioinformática (NBI), Instituto Aggeu Magalhães (IAM), FIOCRUZ-Pernambuco, Recife, Pernambuco,  
16 Brazil

17 <sup>3</sup>Setor de Virologia, Departamento de Medicina Veterinária Preventiva, Universidade Federal de Santa Maria  
18 (UFSM), 97105-900, Santa Maria, RS, Brazil

19 <sup>4</sup>Setor de Virologia, Instituto Keizo Asami, Universidade Federal de Pernambuco, Pernambuco, Brazil. Zip Code:  
20 50670-901;

21 <sup>5</sup>Laboratório NB3 de Neuroimunologia, Universidade Federal de Santa Maria, Rio Grande do Sul, Brazil. Zip Code:  
22 97105-900;

23 <sup>6</sup>Departamento de Microbiologia e Parasitologia, Universidade Federal de Santa Maria, Rio Grande do Sul, Brazil.  
24 Zip Code: 97105-900

25 <sup>7</sup> Programa de Pós-graduação em Medicina Veterinária, Universidade Federal de Santa Maria, Rio Grande do Sul,  
26 Brazil. Zip Code: 97105-900

27 <sup>8</sup>Campus Palmeira das Missões, Universidade Federal de Santa Maria. Palmeira das Missões, Rio Grande do Sul,  
28 Brazil. Zip Code: 98300-000.

29 <sup>9</sup>Life Sciences Institute, Universidade Federal de Juiz de Fora. Governador Valadares, Minas Gerais, Brazil. Zip  
30 Code: 35010-180.

31 <sup>10</sup>Centro Estadual de Vigilância em Saúde. Secretaria Estadual da Saúde do Rio Grande do Sul. Porto Alegre, Rio  
32 Grande do Sul, Brazil. Zip Code: 90610-000.

33 <sup>11</sup>Hospital Universitário de Santa Maria (HUSM), Universidade Federal de Santa Maria (UFSM), Av. Roraima,  
34 1000, 97105-900, Santa Maria, RS, Brazil

35 <sup>12</sup>Departamento de Bioquímica e Biologia Molecular, Universidade Federal de Santa Maria (UFSM), Av. Roraima,  
36 1000, 97105-900, Santa Maria, RS, Brazil

37 <sup>13</sup>Núcleo de Plataformas Tecnológicas (NPT), Instituto Aggeu Magalhães (IAM), FIOCRUZ-Pernambuco, Recife,  
38 Pernambuco, Brazil

39 <sup>14</sup>Núcleo de Ciências da Vida, Universidade Federal de Pernambuco (UFPE), Centro Acadêmico do Agreste-  
40 Rodovia BR-104, km 59-Nova Caruaru, Caruaru 55002-970, Brazil

**NOTE: This preprint reports new research that has not been certified by peer review and should not be used to guide clinical practice.**

41 <sup>15</sup>Departamento de Microbiologia, Instituto Aggeu Magalhães (IAM), FIOCRUZ-Pernambuco, Recife, Pernambuco,  
42 Brazil

43 <sup>16</sup>Laboratório de Virologia Molecular, Instituto Carlos Chagas, Fundação Oswaldo Cruz, Curitiba, Paraná, Brazil

44 <sup>17</sup>Departamento de Zootecnia e Ciências Biológicas, Universidade Federal de Santa Maria, Palmera das Missões,  
45 Rio Grande do Sul, Brazil. Zip Code: 98300-000.

46 <sup>18</sup>Department of Arbovirology, Bernhard Nocht Institute for Tropical Medicine, WHO Collaborating Center for  
47 Arbovirus and Hemorrhagic Fever Reference and Research. National Reference Center for Tropical Infectious  
48 Diseases. Bernhard-Nocht-Straße 74, 20359 Hamburg - Germany.

49

## 50 **Abstract**

51 Brazil's COVID-19 response has faced challenges due to the continuous emergence of  
52 variants of concern (VOCs), emphasizing the need for ongoing genomic surveillance and  
53 retrospective analyses of past epidemic waves. Rio Grande do Sul (RS), Brazil's southernmost  
54 state, has crucial international borders and trades with Argentina and Uruguay, along with  
55 significant domestic connections. The source and sink of transmission with both national and  
56 international hubs raises questions about the RS role in the transmission of the virus, which  
57 has not been fully explored. Nasopharyngeal samples from various municipalities in RS were  
58 collected between June 2020 and July 2022. SARS-CoV-2 whole genome amplification and  
59 sequencing were performed using high-throughput Illumina sequencing. Bioinformatics  
60 analysis encompassed the development of scripts and tools to take into account  
61 epidemiological information to reduce sequencing disparities bias among the  
62 regions/countries, genome assembly, and large-scale phylogenetic reconstruction. Here, we  
63 sequenced 1,480 SARS-CoV-2 genomes from RS, covering all major regions. Sequences  
64 predominantly represented Gamma (April-June 2021) and Omicron (January-July 2022)  
65 variants. Phylogenetic analysis revealed a regional pattern for transmission dynamics,  
66 particularly with Southeast Brazil for Gamma, and a range of inter-regional connections for  
67 Delta and Omicron within the country. On the other hand, international and cross-border  
68 transmission with Argentina and Uruguay was rather limited. We evaluated the three VOCs  
69 circulation over two years in RS using a new subsampling strategy based on the number of  
70 cases in each state during the circulation of each VOC. In summary, the retrospective analysis  
71 of genomic surveillance data demonstrated that virus transmission was less intense between  
72 country borders than within the country. These findings suggest that while non-  
73 pharmacological interventions were effective to mitigate transmission across international land  
74 borders in RS, they were insufficient to contain transmission at the domestic level.

## 75 **1. Introduction**

76           The first cases of effective human-to-human transmission of SARS-CoV-2 were  
77 identified in Wuhan, China, in December 2019 (1). Since then, this virus has spread globally  
78 culminating in a pandemic declared on 11th March 2020 (2). As of February 2024, there have  
79 been 676 million global cases and more than 6.8 million deaths (3) and Brazil registered more  
80 than 37 million of the total cases and almost 700 thousand deaths in the same period (3).  
81 These figures are a consequence of the high transmissibility of air-borne pathogens such as  
82 the SARS-CoV-2 through symptomatic and asymptomatic patients and continuous  
83 adaptations to the new human host (4–6). The rapid evolution of the SARS-CoV-2 under  
84 changing evolutionary pressures associated with millions of infected patients (3) has resulted  
85 in the emergence and spread of more transmissible and/or more immunological evasive  
86 SARS-CoV-2 lineages around the globe that are dynamically classified as Variants of Interest  
87 (VOIs) and Variants of Concern (VOCs) (7).

88           Besides the development of different vaccine technologies (8) and the success of  
89 vaccine campaigns across the world, which culminated in a decrease in cases, particularly in  
90 severe disease and hospitalizations (9–11), the SARS-CoV-2 is still circulating and evolving  
91 into new lineages. These new lineages carry specific sets of immune escape mutations  
92 allowing the reinfection of previously infected or vaccinated hosts (12–14). Since the start of  
93 the pandemic, five major VOCs encompassing several lineages have originated and spread  
94 across the globe. The first VOC identified was the Alpha lineage in September 2020 (15)  
95 followed by Beta in October 2020 (16), Gamma in November 2020 (17), Delta in October but  
96 spread globally in May 2021 (18), and Omicron in November 2021 (19), which is the single  
97 VOC circulating nowadays, and now considered as a VOI (20), with several sublineages co-  
98 circulating (20).

99           Knowledge about the spreading of different SARS-CoV-2 lineages is only possible due  
100 to the efforts of genomic surveillance, an effort carried out by thousands of research groups  
101 across the globe (21,22). In Brazil, due to its large geographic territory, several groups have  
102 been characterizing the emergence and spreading of different SARS-CoV-2 lineages across  
103 the country (17,23–27). Besides the efforts to perform genomic surveillance studies in Brazil,  
104 the majority of Brazilian studies focus on the Southeast region - the most populous region,  
105 and with the major number of cases - (25). Moreover, the studies focused on Rio Grande do  
106 Sul were carried out at the beginning of the pandemic (28–30) or focused on specific cities  
107 (31,32). Herein, we aimed to characterize the circulation of SARS-CoV-2 lineages during the  
108 first two and a half years of the pandemic (up to July 2022) across Rio Grande do Sul state  
109 state which have epidemiological links with samples from other Brazilian states, besides the  
110 large land border of Rio Grande do Sul with Argentina and Uruguay.

111 We sequenced 1,480 genomes from samples collected from June 2020 to July 2022.  
112 The genomes represent several lineages from Gamma, Delta, and Omicron VOCs as well as  
113 non-VOI and non-VOC lineages. The samples represent different cities across the Rio Grande  
114 do Sul. These findings are of particular importance to prioritize non-pharmacological  
115 interventions at the interstate and national level during the following SARS-CoV-2 waves.

116

## 117 **2. Material and Methods**

118 Nasal and oropharyngeal specimens, previously identified as positive for SARS-CoV-  
119 2, were obtained from the Universidade Federal de Santa Maria main campus and the  
120 Palmeira das Missões Campus representing samples from 277 Rio Grande do Sul  
121 municipalities mainly covering the Central and Northwest regions of the state during the period  
122 from 23 June 2020 to 7 July 2022. Reverse Transcription Quantitative Polymerase Chain  
123 Reaction (RT-qPCR) assays were conducted utilizing the Biomol OneStep Covid-19 Kit  
124 (IBMP, Paraná, BR) and the Molecular SARS-CoV-2 Kit (Bio-manguinhos, Rio de Janeiro, RJ,  
125 BR), strictly adhering to the specifications provided by the manufacturers. Specimens  
126 exhibiting a Cycle Threshold (Ct) value below 25 were subsequently subjected to amplification  
127 and sequencing processes, as delineated in (33,34).

### 128 **2.1. Viral Genetic Material Sequencing**

129 For this study, two distinct methodologies were employed to synthesize  
130 complementary DNA (cDNA) and to amplify the SARS-CoV-2 genome. These included: the  
131 short amplicon approach based on the ARTIC protocol (accessible at [https://github.com/artic-](https://github.com/artic-network/artic-ncov2019)  
132 [network/artic-ncov2019](https://github.com/artic-network/artic-ncov2019)) (33); and the incorporation of three sets of primers within the  
133 COVIDSeq protocol, following Naveca, et al., 2021 (35). After the generation of genome-wide  
134 amplicons, samples were processed for sequencing employing either the Illumina DNA Prep  
135 (Illumina, San Diego, CA, USA) or the COVIDSeq (Illumina, San Diego, CA, USA) library  
136 preparation protocols, following the guidelines provided by the manufacturer. The sequencing  
137 process was executed using the Illumina MiSeq system, specifically employing the MiSeq  
138 Reagent Kit V3 for a paired-end 150 cycles flow cell. Ethical clearance for this study was  
139 granted by CEP UFSM under the authorization number 52939821.5.0000.5346 and  
140 47588621.7.1001.5346 and by CEP from Escola de Saúde Pública/SES-RS under the  
141 authorization number CAAE: 67181123.1.0000.5312.

### 142 **2.2. Genome Assembly**

143 In this study, we used the ViralFlow v0.0.6 workflow (36). This workflow was designed  
144 for efficient and accurate assembly of viral genomes. Briefly, raw sequence data were quality  
145 filtered to remove reads (`--cut_front --cut_tail --qualified_quality_phred 20 -l 35 -f 35 -t 35 -F`  
146 `35 -T 35`) with fastp tool (37). Subsequently, the cleaned reads were mapped with BWA (38)  
147 against the Wuhan SARS-CoV-2 genome (NC\_045512.2). The consensus genomes were  
148 generated with the iVar tool (39), where a base is called to the consensus when it reaches at  
149 least 5x of coverage depth; on multi-allele loci, alleles with higher frequency ( $VAF \geq 0.51$ )  
150 are considered for the consensus genome. The assembly metrics and SARS-CoV-2 lineages  
151 are defined using bamdst (40) and pangolin (41), respectively, both present in the ViralFlow  
152 workflow. All samples with 70% or more of coverage breadth are included in the initial  
153 phylogenetic analysis with MAPLE v0.3.1 (42) to detect if the lack of sequencing regions  
154 results in long branches on phylogenetic trees.

### 155 **2.3. Subsampling Strategy**

156 In light of the extensive dataset of SARS-CoV-2 genomes available in the GISAID-  
157 EpiCoV database (43), which encompasses millions of genomes globally (15,271,031  
158 genomes in the collection date of this study), including hundreds of thousands from Brazil  
159 (214,213 genomes), it became imperative to utilize a systematic subsampling strategy  
160 informed by epidemiological data. To facilitate this, we developed an in-house R  
161 (<https://www.r-project.org/>) script, named explore.R (see **Data Availability** for details), to  
162 determine the appropriate number of genomes to subsample across various Brazilian regions  
163 for Gamma, Delta, and Omicron. This script harnesses data from both the EpiCoV database  
164 and covid19.org.br, collected on February 6, 2023, to assess and use the ratio of COVID-19  
165 cases to estimate the proportion subsampling of the available genomes for each  
166 aforementioned VOCs in specific periods.

167 To delineate the temporal and spatial distribution of the Gamma, Delta, and Omicron  
168 variants within Brazil, we referred to existing literature to establish the onset of their circulation  
169 in the country: Gamma in November 2020 (17), Delta in April 2021 (18), and Omicron in  
170 November 2021 (19). Our study's scope was extended until August 2022, based on the date  
171 of the most recent sample sequenced in our analysis.

172 To perform the subsampling process, we developed an in-house tool: the Gisaid  
173 Subsampling Toolkit, or GIST. GIST processes a JSON file containing the count of genomes  
174 from various Brazilian regions, derived from the output of the 'explore.R' script. It employs a  
175 combination of Augur (44), BLAST (45), and MAFFT (46) for three distinct analyses (**Code**  
176 **Availability** section for more details, **SupplementaryData1**). Briefly, in the first analysis, we

177 utilize Augur to sample genomes. This step involves the exclusion of genomes from non-  
178 human hosts, those lacking a collection date, and sequences shorter than 28,400 bases,  
179 approximately 95% of the SARS-CoV-2 Wuhan genome's coverage. The sampling is stratified  
180 based on the number of genomes by state, further grouped by pango lineage, year, and  
181 month. Following this initial sampling, the second phase of analysis enriches the dataset with  
182 genetically similar genomes. This is achieved through a BLAST analysis filtering results  
183 between 99% and 99.98% of identity with query coverage high scoring pairs (HSP) greater or  
184 equal to 99.9%. In the final stage of analysis, we conduct a multiple sequence alignment using  
185 MAFFT, employing parameters such as `--keeplength`, `--kimura 1`, and `--6merpair`, while  
186 specifically masking the UTR regions.

## 187 **2.4. Phylogenetic Analysis**

188 Three initial trees - one for Gamma, Delta, and Omicron datasets - were reconstructed  
189 using MAPLE v0.3.1 (42) to detect long branches. Genomes showing long branches  
190 (**SupplementaryData2**) were removed from the original alignment. The edited alignments  
191 were used in a maximum likelihood phylogenetic analysis with IQ-TREE2 v.2.2.0 (47), the best  
192 substitution model was defined using ModelFinder (48) implemented on IQ-TREE2 and the  
193 SH-aLRT test (49) to branch support. The phylogenetic trees were annotated in iTOL v.6 (50)  
194 to identify clades of specific lineages with branch support higher than 0.8 (aLRT) with at least  
195 4 genomes from Rio Grande do Sul. The identified clades were split into different datasets,  
196 one for each clade lineage.

## 197 **2.5. Temporal Estimation**

198 To estimate the tMRCA of clades identified in phylogenetic analysis each lineage  
199 dataset was used in an analysis flow which encompasses: A first phylogenetic tree  
200 reconstruction with IQ-TREE2 v.2.2.0; A TempEst v.1.5.3 (51) analysis to identify the age root  
201 correlation; removal of outliers with in-house R scripts, that receives the output of TempEst  
202 and identify outlier sequences based on the thresholds of 1.5x of Interquartile Range IQR of  
203 all samples in the dataset; A second tree reconstruction with IQ-TREE2 v.2.2.0 using the  
204 dataset alignments without outliers; And finally a temporal analysis with TreeTime v.0.11 (52).  
205

## 206 **3. Results**

### 207 **3.1. Sequencing Results**

208 During the period and for the purpose of the present study, 1,480 genomes were  
209 sequenced and deposited on EpiCoV - GISAID database (**SupplementaryData3**). The

210 samples contain representatives of most parts of the North, Center, and West of the Rio  
211 Grande do Sul state (<https://microreact.org/project/2utyqQKoA7zDkYHEuzvyTG-sarsufsmiac>  
212 [en](#)), and encompass approximately 30% of all genomes submitted for the state (1,480 from  
213 5,065 genomes) and deposited on GISAID in the period of the study (**SupplementaryData3**).  
214 The submitted consensus genomes from our group represent samples that meet one of the  
215 following criteria: 90% or more of genome coverage breadth (horizontal coverage) or 70% or  
216 more genome coverage breadth and that do not belong to clades with long branches on initial  
217 MAPLE phylogenetic analysis. The samples are majorly composed of Gamma lineages and  
218 sublineages during the period from April to June 2021 (**Figure 1**), and Omicron lineages and  
219 sublineages during the period of January to July 2022, which is in line with the general  
220 numbers presented on EpiCoV - GISAID (**Figure 2**). Besides the analysis of this study is  
221 focused on SARS-CoV-2 samples sequenced in Rio Grande do Sul, we noticed similar  
222 patterns of lineage frequencies sequenced in other regions of Brazil (**Figure 2**). The most  
223 prevalent lineages for each analyzed VOC on Rio Grande do Sul were P.1, P.1.14, P.1.2,  
224 P.1.4 and P.1.7 for Gamma; AY.43, AY.99.2, AY.99.1, AY.101, AY.34.1 and AY.46.3 for Delta;  
225 and the most prevalent lineages BA.1, BA.1.1, BA.2, BA.5, BA.5.2, BA.4 and BQ for Omicron  
226 (**Figure 2**).

227 **Figure 1:** Number of samples sequenced in this study per month. \*\*Omicron genomes not related to BA, BE, BQ, and DL lineages.

### 228 **3.2. SARS-Cov-2 clades circulating on Rio Grande do Sul**

229 The subsampling strategy with explorer.R and GIST resulted in three major datasets:  
230 One for each VOC Gamma, Delta, and Omicron, encompassing the most frequent lineages  
231 on Rio Grande do Sul during the period of the study as well as outgroups with ancestors of  
232 respective lineages (**SupplementaryData4**). Each dataset corresponds to Brazilian genomes  
233 plus genomes from Latin America (particularly Paraguay, Argentina and Uruguay) and other  
234 regions of the globe, recovered from the GIST BLAST analysis (**SupplementaryData5**).

235 The initial phylogeny of Gamma corresponds to 4,545 genomes (**Figure 3A**), where 6  
236 clades were identified (**Figure 3B**). One clade (P.1.14-I) represents sequences from P.1.14,  
237 two clades (P.1-I~II) represent sequences of P.1 lineage, and three (P.1.2-I~III) of P.1.2  
238 lineage. The Gamma analysis shows samples from Rio Grande do Sul clustering with  
239 sequences from the Southeast region of Brazil: The P.1.14-I and P.1-II clades encompass  
240 basal sequences from Minas Gerais (MG) and São Paulo (SP) states, the P.1-I clade presents  
241 basal Rio Grande do Sul samples clustered with South America samples from Argentina and  
242 Paraguay, and the clades P.1-II and P.1.2-III have well-defined sister clades from Uruguay  
243 and São Paulo, respectively.

244 The initial phylogeny of Delta corresponds to 4,358 genomes (**Figure 4A**) where 6  
245 clades were identified (**Figure 4B**). Four clades (AY.99.2-I~IV) represent sequences from  
246 AY.99.2 lineage, and 2 clades (AY.101-I~II) represent sequences from AY.101 lineage. The  
247 Delta analysis shows different clustering of Rio Grande do Sul (RS) and sampled from other  
248 Brazilian regions. The AY.99.2-I clade shows a possible transmission from Rio Grande do Sul  
249 to Minas Gerais, and the AY.99.2-IV from Minas Gerais to Rio Grande do Sul. The clade  
250 AY.101-I shows a route of transmission from Rio Grande do Sul to the Central-West region of  
251 Brazil, as well as from Rio Grande do Sul to Rio de Janeiro (RJ), and the AY.101-II clade from  
252 Rio Grande do Sul to São Paulo state.

253 The omicron phylogenetic analysis was performed with 4,639 genomes (**Figure 5A**)  
254 representing 5 distinct clades (**Figure 5B**) with Rio Grande do Sul samples from BA.1.1,  
255 BA.5.2, and BA.2 lineages. Different from Delta and Gamma analysis, where several clades  
256 clustered with other clades from the South-East region - mainly from São Paulo, Rio de  
257 Janeiro, and Minas Gerais states - the Omicron clades are mostly composed of Rio Grande  
258 do Sul samples, except for BA.5.2-I clade, that clustered with samples from the Goias state  
259 (GO) - Central-West region.

260 **Figure 2.** Prevalence of SARS-CoV-2 lineages and number of genomes per period, based on EpiCoV GISAID data. **A.** Specific  
261 lineages and variants in Brazil. **B.** Specific lineages and variants in Rio Grande do Sul. **C.** Gama lineages in Brazil. **D.** Gama  
262 lineages in Rio Grande do Sul. **E.** Delta lineages in Brazil. **F.** Delta lineages in Rio Grande do Sul. **G.** Omicron lineages in Brazil.  
263 **H.** Omicron lineages in Rio Grande do Sul. \*\*Omicron genomes not related to BA, BE, BQ, and DL lineage.

264  
265 **Figure 3.** Maximum likelihood analysis of Gamma variant lineages, Branch support was accessed by the aLRT branch support.  
266 Tip colors are based on Brazilian regions and the 5 countries that presented the highest number of sequences recovered via  
267 blast. **A.** Complete tree. **B.** Well-supported subclades. Bold sample lanes represent genomes sequenced in this study. \*\*  
268 Collapsed clade that represents all sequences after P.1-I clade. Complete figure with branch support and uncollapsed clade is  
269 available on **SupplementaryData6**.

270  
271 **Figure 4.** Maximum likelihood analysis of Delta variant lineages, numbers within with squares are aLRT branch support of  
272 respective clades. Colorful tips based on Brazilian regions and the 5 countries that presented the highest number of sequences  
273 recovered via blast. **A.** Complete tree. **B.** Well supported subclades including Rio Grande do Sul samples. Bold sample lanes  
274 represent genomes sequenced in this study. Complete figure with branch support and uncollapsed clade is available on  
275 **SupplementaryData7**.

276  
277 **Figure 5.** Maximum likelihood analysis of lineages of the Omicron variant, aLRT branch support. Colorful tips based on Brazilian  
278 regions and the 5 countries that presented the highest number of sequences recovered via blast. **A.** Complete tree. **B.** Subclades.  
279 Bold sample lanes represent genomes sequenced in this study. Complete figure with branch support and uncollapsed clade is  
280 available on **SupplementaryData8**.

### 281 **3.3. Temporal estimation of 7 lineages circulating on Rio Grande do Sul**

282 To identify the possible emergence and spreading timing of the lineages associated  
283 with the identified clades within the state, we performed temporal analysis using treetime for  
284 7 datasets (**Table 1**) which represents the clades identified with Rio Grande do Sul samples  
285 in the evolutionary analysis.

286 **Table 1.** Datasets and tMRCA inferred by treetime tool



| lineage | number of samples | tMRCA                |
|---------|-------------------|----------------------|
| P.1.2   | 482               | 2021-01-12 ~ 2021.03 |
| P.1.14  | 540               | 2020-12-15 ~ 2020.95 |
| AY.101  | 1030              | 2021-03-22 ~ 2021.22 |
| AY.99.2 | 1953              | 2021-03-26 ~ 2021.23 |
| BA.1.1  | 1467              | 2021-10-09 ~ 2021.77 |
| BA.5.2  | 384               | 2022-02-11 ~ 2022.11 |
| BA.2    | 1530              | 2021-12-09 ~ 2021.93 |

287

288           Considering the tMRCA from treetime as the start time of lineages circulation, and the  
289 last collection date of samples (**Supplementary Data3**) as the end time of circulation, the  
290 Gamma P.1.2 and P.1.14 lineages were estimated to have occurred on Rio Grande do Sul  
291 between mid-December 2020 to late June 2021 for P.1.14 and mid-January 2020 to late June  
292 2021 for P.1.2.

293           For Delta lineages, the AY.101 was estimated to have circulated between mid-March  
294 2021 to late November 2021 and the AY.99.2 from late March 2021 to early December 2021,  
295 and for Omicron lineages, the BA.1.1 started circulating in the state in mid-August 2021, the  
296 BA.2 in mid-December 2021 and the BA.5.2 in mid-February 2022 and both of them are still  
297 circulating during the time of the data collection of this study: early July 2022.

#### 298 **4. Discussion**

299           The SARS-CoV-2 virus is the latest example of a zoonotic pathogen that has made its  
300 way to effective human-to-human transmission resulting in the COVID-19 pandemic. Despite  
301 numerous efforts to implement large-scale genomic surveillance around the world, there  
302 remain underrepresented populations and areas where laboratory and genomic surveillance  
303 is scarce (21). In Brazil, SARS-CoV-2 genomic surveillance was established across the  
304 country, but as expected, most of the data comes from the most populated cities on the Atlantic  
305 coast and large capital cities from states without sea borders where there were more available  
306 diagnostic and research laboratories. That is the case of the Rio Grande do Sul state where  
307 there is a higher concentration of diagnostic and genomic information from the capital city  
308 Porto Alegre and surrounding municipalities. In this study, we generated 1,480 genomes  
309 mainly from the central and Northeast regions of the state to augment the genomic information  
310 from the Rio Grande do Sul state. Then we subsampled the main lineages circulating in the  
311 state to test hypotheses regarding the sink and source role of the state to other Brazilian states

312 and border countries Argentina and Uruguay. We found that inter-state transmission was  
313 much more important in SARS-CoV-2 lineages transmission spread from and to the Rio  
314 Grande do Sul state than inter-country transmission.

315 The extremely large number of SARS-CoV-2 genomes currently available (the global  
316 dataset used in this study included 15,271,032 genomes) makes phylogenetic inferences  
317 timing and computationally consuming (53). Current approaches to handle such a massive  
318 amount of data are focused on lineages subsampling taking into consideration lineages  
319 presence in different locations and prevalence (54). The Augur software (44), implements  
320 some sub-sampling algorithms but does not consider the epidemiological estimates such as  
321 the number of cases per region. Considering the global disparities of genome sequencing  
322 throughout different geographic regions (21) we implemented a sampling strategy based on  
323 the number of cases and genomes by region per time using the in-house script explore.R  
324 which allowed us to more precisely sample genomes following the increase and decrease in  
325 cases and remove the sampling biases present in the global and local datasets.

326 Our global subsampled phylogenetic reconstruction of Gamma and Delta clades  
327 showed that the United States of America and the Central-West region of Brazil were placed  
328 in a basal position near the root suggesting that these regions were the source point to spread  
329 these lineages to Brazil. Previous evidence has shown the origins of each analyzed VOC,  
330 such as Gamma with P.1 lineage in the North region of Brazil (17), Delta with B.1.617.2 lineage  
331 in India (18), and Omicron with B.1.1.529 lineage in South Africa (19). But this is the first  
332 large-scale analysis showing that the Delta lineage was probably introduced from the USA to  
333 Brazil and that the Central-West region of Brazil acted as an important hub for the spreading  
334 of the Omicron lineage to other major regions of the country.

335 Based on the augmented dataset of SARS-CoV-2 genomes from Rio Grande do Sul  
336 including genomes of previously undersampled regions (Center and Northwestern) we next  
337 evaluated if the main transmission chains with Rio Grande do Sul occurred with other Brazilian  
338 states or with border countries Argentina and Uruguay. Previous studies characterized the  
339 spreading of B.1.1.28 and B.1.1.33 lineages from Rio Grande do Sul to Uruguay (55). Besides  
340 the large terrestrial frontier between Rio Grande do Sul and Uruguay and Argentina, our  
341 results showed only one probable migration event of the P.1 lineage from Rio Grande do Sul  
342 to Uruguay (**Figure 3B**, clade P.1-II). The clades of P.1.2 lineage showed samples from Rio  
343 Grande do Sul as ancestors from samples of Southeast, in line with the evidence showing the  
344 likely origin of this sub-lineage in the state (31). The P.1.14-I clade, showed an ancestral origin  
345 of P.1.14 samples from Southeast towards Rio Grande do Sul in line with the findings shown  
346 by Ferrareze, et al. 2024 (56).

347           There are few studies about Delta lineages on Rio Grande do Sul, one of the reasons  
348 may be related to the low number of samples sequenced in this period (**Figure 2B**). Our results  
349 showed that two main Delta lineages circulated on Rio Grande do Sul: the AY.99.2 and the  
350 AY.101, corroborating the results from Castro et al, 2023 (57) and Arantes et al, 2022 (27)  
351 that addressed the early emergence of Delta in Brazil. The circulation of those lineages  
352 appears to have occurred from July 2021 to January 2022, with the tMRCA of those lineages  
353 estimated from late March 2021, which is in line with the estimations of Arante et al, 2023 for  
354 AY.101 (27). The clades of AY.99.2 showed samples from Rio Grande do Sul as ancestors  
355 (**Figure 4B** Clade AY.99.2-I) with spreading to Minas Gerais (Southeast region), while the  
356 clade AY.99.2-IV showed the opposite, which indicates a spreading of AY.99.2 between those  
357 2 states. The analysis of AY.101 clades also revealed Rio Grande do Sul samples as  
358 ancestors and a putative migration to Southeast states: Rio de Janeiro (AY.101-I clade) and  
359 São Paulo (AY.101-II clade).

360           Our results showed that ancestral samples of AY.99.2 from the Rio Grande do Sul  
361 state and posterior spreading to the Southeast were in line with other studies (56). On the  
362 other hand, the same study identified the introduction of AY.101 lineage in the Southeast  
363 region in early January 2021, and the posterior introduction in Rio Grande do Sul in July 2021  
364 which diverged from our findings of an introduction from Rio Grande do Sul to the Southeast  
365 region. The divergence about the AY.101 phylogeographic inferences may be the result of  
366 different subsampling strategies, where Ferraze et al, 2024 (56) used the Augur subsampling  
367 strategy based on Pango lineage, and we used the Augur inside GIST performing a  
368 subsampling based on normalized genomes by state cases and then the sampling by Pango  
369 Lineage and collection date.

370           The Omicron analysis showed three main lineages circulating on Rio Grande do Sul  
371 during the period of the study: BA.1.1, BA.5.2, and BA.2 which is in line with other Brazilian  
372 states (**Figure 2G, H**). During the first quarter of 2022, the BA.1 and BA.1.1 lineages were the  
373 most prevalent, as described previously (58) but were further replaced by BA.2, BA.5, and BQ  
374 from June to July 2022 (59). There is no phylogenetic information in the literature about the  
375 relation of Omicron lineages from Rio Grande do Sul and other locations, our results showed  
376 that excluding the BA.5.2-I clade (**Figure 5B**), the omicron clades are majorly formed by  
377 samples from Rio Grande do Sul. The BA.5.2-I clade showed a close relation between Rio  
378 Grande do Sul samples and Goias samples (Central West Brazilian region).

379           Despite the standardization of sampling methods, sequencing disparities (21) may still  
380 generate sampling biases that can affect genomic surveillance studies, here we identified both  
381 local sampling disparities on the Rio Grande do Sul (by state regions and periods, see

382 <https://microreact.org/project/2utyqQKoA7zDkYHEuzvyTG-sarsufsmIacen>) and in countries  
383 that have terrestrial borders with the Southern region of Brazil (Paraguay, Argentina, and  
384 Uruguay, see **Supplementary Data 9**). These results may have biased our inferences, but on  
385 the other hand, this was the most comprehensive study posed to augment the Rio Grande do  
386 Sul dataset in underrepresented areas as well as to employ a case incidence aware  
387 subsampling scheme that minimized as much as possible the impact of these biases as much  
388 as possible.

389 Overall, our findings suggest that despite the large land border and intense  
390 international transportation of goods between Rio Grande do Sul, Argentina, and Uruguay few  
391 examples of cross-border transmission occurred, likely due to more effective non-  
392 pharmacological interventions applied at countries' borders and that the major sink and source  
393 transmission pathways of SARS-CoV-2 with the Rio Grande do Sul state occurred between  
394 Brazilian states from the Southeast and Central West part of the country.

395

## 396 **5. Conclusion**

397 Overall, our study underscores the importance of robust sampling strategies and  
398 comprehensive genomic surveillance efforts to accurately track the spatio-temporal spread of  
399 SARS-CoV-2 lineages. By applying a sampling strategy based on the number of genomes  
400 and epidemiological information, we described the most prevalent clades of Gamma, Delta,  
401 and Omicron lineages that circulated in Rio Grande do Sul Brazil, during the period from June  
402 2020 to July 2022 and showed that the large majority of transmission events took place  
403 between Brazilian states of the South-East and Central-West regions than between countries  
404 sharing land borders with Rio Grande do Sul.

405

## 406 **Acknowledgments**

407 AGB and TFR thank FAPERGS (grant ARD #21/2551-0000703-6) for financial support. G.L.W  
408 is supported by the Conselho Nacional de Desenvolvimento Científico e Tecnológico (CNPq)  
409 through their productivity grant (307209/2023-7).

410

## 411 **References**

412 1. A new coronavirus associated with human respiratory disease in China | Nature [Internet].

- 413 [cited 2024 Apr 22]. Available from: <https://www.nature.com/articles/s41586-020-2008-3>
- 414 2. WHO Director-General's opening remarks at the media briefing on COVID-19 - 11 March  
415 2020 [Internet]. [cited 2024 Apr 22]. Available from: [https://www.who.int/director-](https://www.who.int/director-general/speeches/detail/who-director-general-s-opening-remarks-at-the-media-briefing-on-covid-19---11-march-2020)  
416 [general/speeches/detail/who-director-general-s-opening-remarks-at-the-media-briefing-](https://www.who.int/director-general/speeches/detail/who-director-general-s-opening-remarks-at-the-media-briefing-on-covid-19---11-march-2020)  
417 [on-covid-19---11-march-2020](https://www.who.int/director-general/speeches/detail/who-director-general-s-opening-remarks-at-the-media-briefing-on-covid-19---11-march-2020)
- 418 3. Johns Hopkins Coronavirus Resource Center [Internet]. [cited 2024 Apr 22]. COVID-19  
419 Map. Available from: <https://coronavirus.jhu.edu/map.html>
- 420 4. Yanes-Lane M, Winters N, Fregonese F, Bastos M, Perlman-Arrow S, Campbell JR, et al.  
421 Proportion of asymptomatic infection among COVID-19 positive persons and their  
422 transmission potential: A systematic review and meta-analysis. *PLOS ONE*. 2020 Nov  
423 3;15(11):e0241536.
- 424 5. Hu Z, Song C, Xu C, Jin G, Chen Y, Xu X, et al. Clinical characteristics of 24 asymptomatic  
425 infections with COVID-19 screened among close contacts in Nanjing, China. *Sci China*  
426 *Life Sci*. 2020 May 1;63(5):706–11.
- 427 6. Harrison AG, Lin T, Wang P. Mechanisms of SARS-CoV-2 Transmission and  
428 Pathogenesis. *Trends Immunol*. 2020 Dec 1;41(12):1100–15.
- 429 7. CDC. Centers for Disease Control and Prevention. 2020 [cited 2024 Apr 22]. Coronavirus  
430 Disease 2019 (COVID-19). Available from: [https://www.cdc.gov/coronavirus/2019-](https://www.cdc.gov/coronavirus/2019-ncov/variants/variant-classifications.html)  
431 [ncov/variants/variant-classifications.html](https://www.cdc.gov/coronavirus/2019-ncov/variants/variant-classifications.html)
- 432 8. Vaccines – COVID19 Vaccine Tracker [Internet]. [cited 2024 Apr 22]. Available from:  
433 <https://covid19.trackvaccines.org/vaccines/#approved>
- 434 9. Mohammed I, Nauman A, Paul P, Ganesan S, Chen KH, Jalil SMS, et al. The efficacy and  
435 effectiveness of the COVID-19 vaccines in reducing infection, severity, hospitalization, and  
436 mortality: a systematic review. *Hum Vaccines Immunother* [Internet]. 2022 Jan 31 [cited  
437 2024 Apr 22]; Available from:  
438 <https://www.tandfonline.com/doi/abs/10.1080/21645515.2022.2027160>
- 439 10. Thompson Mark G., Stenehjem Edward, Grannis Shaun, Ball Sarah W., Naleway Allison  
440 L., Ong Toan C., et al. Effectiveness of Covid-19 Vaccines in Ambulatory and Inpatient  
441 Care Settings. *N Engl J Med*. 2021 Oct 6;385(15):1355–71.
- 442 11. Anand P, Stahel VP. The safety of Covid-19 mRNA vaccines: a review. *Patient Saf Surg*.  
443 2021 May 1;15(1):20.
- 444 12. Dejnirattisai W, Zhou D, Supasa P, Liu C, Mentzer AJ, Ginn HM, et al. Antibody evasion  
445 by the P.1 strain of SARS-CoV-2. *Cell*. 2021 May 27;184(11):2939-2954.e9.
- 446 13. Hoffmann M, Arora P, Groß R, Seidel A, Hörnich BF, Hahn AS, et al. SARS-CoV-2 variants  
447 B.1.351 and P.1 escape from neutralizing antibodies. *Cell*. 2021 Apr 29;184(9):2384-  
448 2393.e12.
- 449 14. Ai J, Zhang H, Zhang Y, Lin K, Zhang Y, Wu J, et al. Omicron variant showed lower  
450 neutralizing sensitivity than other SARS-CoV-2 variants to immune sera elicited by  
451 vaccines after boost. *Emerg Microbes Infect*. 2022 Dec 31;11(1):337–43.
- 452 15. Hill V, Du Plessis L, Peacock TP, Aggarwal D, Colquhoun R, Carabelli AM, et al. The  
453 origins and molecular evolution of SARS-CoV-2 lineage B.1.1.7 in the UK. *Virus Evol*.  
454 2022 Jul 1;8(2):veac080.
- 455 16. Tegally H, Wilkinson E, Giovanetti M, Iranzadeh A, Fonseca V, Giandhari J, et al.

- 456 Detection of a SARS-CoV-2 variant of concern in South Africa. *Nature*. 2021  
457 Apr;592(7854):438–43.
- 458 17. Naveca FG, Nascimento V, de Souza VC, Corado A de L, Nascimento F, Silva G, et al.  
459 COVID-19 in Amazonas, Brazil, was driven by the persistence of endemic lineages and  
460 P.1 emergence. *Nat Med*. 2021 Jul;27(7):1230–8.
- 461 18. McCrone JT, Hill V, Bajaj S, Pena RE, Lambert BC, Inward R, et al. Context-specific  
462 emergence and growth of the SARS-CoV-2 Delta variant. *Nature*. 2022  
463 Oct;610(7930):154–60.
- 464 19. Viana R, Moyo S, Amoako DG, Tegally H, Scheepers C, Althaus CL, et al. Rapid epidemic  
465 expansion of the SARS-CoV-2 Omicron variant in southern Africa. *Nature*. 2022  
466 Mar;603(7902):679–86.
- 467 20. Tracking SARS-CoV-2 variants [Internet]. [cited 2024 Apr 22]. Available from:  
468 <https://www.who.int/activities/tracking-SARS-CoV-2-variants>
- 469 21. Brito AF, Semenova E, Dudas G, Hassler GW, Kalinich CC, Kraemer MUG, et al. Global  
470 disparities in SARS-CoV-2 genomic surveillance. *Nat Commun*. 2022 Nov 16;13(1):7003.
- 471 22. Robishaw JD, Alter SM, Solano JJ, Shih RD, DeMets DL, Maki DG, et al. Genomic  
472 surveillance to combat COVID-19: challenges and opportunities. *Lancet Microbe*. 2021  
473 Sep 1;2(9):e481–4.
- 474 23. Faria NR, Mellan TA, Whittaker C, Claro IM, Candido D da S, Mishra S, et al. Genomics  
475 and epidemiology of the P.1 SARS-CoV-2 lineage in Manaus, Brazil. *Science*. 2021 May  
476 21;372(6544):815–21.
- 477 24. Giovanetti M, Fonseca V, Wilkinson E, Tegally H, San EJ, Althaus CL, et al. Replacement  
478 of the Gamma by the Delta variant in Brazil: Impact of lineage displacement on the ongoing  
479 pandemic. *Virus Evol*. 2022 Jan 1;8(1):veac024.
- 480 25. Giovanetti M, Slavov SN, Fonseca V, Wilkinson E, Tegally H, Patané JSL, et al. Genomic  
481 epidemiology of the SARS-CoV-2 epidemic in Brazil. *Nat Microbiol*. 2022 Sep;7(9):1490–  
482 500.
- 483 26. Nonaka CKV, Franco MM, Gräf T, Barcia CA de L, Mendonça RN de Á, Sousa KAF de,  
484 et al. Genomic Evidence of SARS-CoV-2 Reinfection Involving E484K Spike Mutation,  
485 Brazil - Volume 27, Number 5—May 2021 - Emerging Infectious Diseases journal - CDC.  
486 [cited 2024 Apr 22]; Available from: [https://wwwnc.cdc.gov/eid/article/27/5/21-  
487 0191\\_article](https://wwwnc.cdc.gov/eid/article/27/5/21-0191_article)
- 488 27. Arantes I, Gomes Naveca F, Gräf T, COVID-19 Fiocruz Genomic Surveillance Network,  
489 Miyajima F, Faoro H, et al. Emergence and Spread of the SARS-CoV-2 Variant of Concern  
490 Delta across Different Brazilian Regions. *Microbiol Spectr*. 2022 Aug 24;10(5):e02641-21.
- 491 28. Mayer A de M, Gröhs Ferrareze PA, de Oliveira LFV, Gregianini TS, Neves CLAM,  
492 Caldana GD, et al. Genomic characterization and molecular evolution of SARS-CoV-2 in  
493 Rio Grande do Sul State, Brazil. *Virology*. 2023 May;582:1–11.
- 494 29. Martins AF, Zavascki AP, Wink PL, Volpato FCZ, Monteiro FL, Rosset C, et al. Detection  
495 of SARS-CoV-2 lineage P.1 in patients from a region with exponentially increasing  
496 hospitalisation rate, February 2021, Rio Grande do Sul, Southern Brazil. *Eurosurveillance*.  
497 2021 Mar 25;26(12):2100276.
- 498 30. Francisco Jr R da S, Benites LF, Lamarca AP, de Almeida LGP, Hansen AW, Gularte JS,  
499 et al. Pervasive transmission of E484K and emergence of VUI-NP13L with evidence of

- 500 SARS-CoV-2 co-infection events by two different lineages in Rio Grande do Sul, Brazil.  
501 *Virus Res.* 2021 Apr 15;296:198345.
- 502 31. Franceschi VB, Caldana GD, Perin C, Horn A, Peter C, Cybis GB, et al. Predominance of  
503 the SARS-CoV-2 Lineage P.1 and Its Sublineage P.1.2 in Patients from the Metropolitan  
504 Region of Porto Alegre, Southern Brazil in March 2021. *Pathogens.* 2021 Aug;10(8):988.
- 505 32. Franceschi VB, Caldana GD, de Menezes Mayer A, Cybis GB, Neves CAM, Ferrareze  
506 PAG, et al. Genomic epidemiology of SARS-CoV-2 in Esteio, Rio Grande do Sul, Brazil.  
507 *BMC Genomics.* 2021 May 20;22(1):371.
- 508 33. Quick J. nCoV-2019 sequencing protocol. 2020 Jan 22 [cited 2024 Apr 22]; Available from:  
509 <https://www.protocols.io/view/ncov-2019-sequencing-protocol-bbmuik6w>
- 510 34. Itokawa K, Sekizuka T, Hashino M, Tanaka R, Kuroda M. Disentangling primer interactions  
511 improves SARS-CoV-2 genome sequencing by multiplex tiling PCR. *PLOS ONE.* 2020  
512 Sep 18;15(9):e0239403.
- 513 35. Naveca FG, Nascimento V, Souza V, Corado A de L, Nascimento F, Silva G, et al. Spread  
514 of Gamma (P.1) Sub-Lineages Carrying Spike Mutations Close to the Furin Cleavage Site  
515 and Deletions in the N-Terminal Domain Drives Ongoing Transmission of SARS-CoV-2 in  
516 Amazonas, Brazil. *Microbiol Spectr.* 2022 Feb 23;10(1):e02366-21.
- 517 36. Dezordi FZ, Neto AM da S, Campos T de L, Jeronimo PMC, Aksenon CF, Almeida SP, et  
518 al. ViralFlow: A Versatile Automated Workflow for SARS-CoV-2 Genome Assembly,  
519 Lineage Assignment, Mutations and Intrahost Variant Detection. *Viruses.* 2022  
520 Feb;14(2):217.
- 521 37. Chen S, Zhou Y, Chen Y, Gu J. fastp: an ultra-fast all-in-one FASTQ preprocessor.  
522 *Bioinformatics.* 2018 Sep 1;34(17):i884–90.
- 523 38. Li H, Durbin R. Fast and accurate short read alignment with Burrows–Wheeler transform.  
524 *Bioinformatics.* 2009 Jul 15;25(14):1754–60.
- 525 39. Grubaugh ND, Gangavarapu K, Quick J, Matteson NL, De Jesus JG, Main BJ, et al. An  
526 amplicon-based sequencing framework for accurately measuring intrahost virus diversity  
527 using PrimalSeq and iVar. *Genome Biol.* 2019 Jan 8;20(1):8.
- 528 40. shiquan. shiquan/bamdst [Internet]. 2024 [cited 2024 Apr 22]. Available from:  
529 <https://github.com/shiquan/bamdst>
- 530 41. O’Toole Á, Scher E, Underwood A, Jackson B, Hill V, McCrone JT, et al. Assignment of  
531 epidemiological lineages in an emerging pandemic using the pangolin tool. *Virus Evol.*  
532 2021;7(2):veab064.
- 533 42. De Maio N, Kalaghatgi P, Turakhia Y, Corbett-Detig R, Minh BQ, Goldman N. Maximum  
534 likelihood pandemic-scale phylogenetics. *Nat Genet.* 2023 May;55(5):746–52.
- 535 43. Khare S, Gurry C, Freitas L, Schultz MB, Bach G, Diallo A, et al. GISAID’s Role in  
536 Pandemic Response. *China CDC Wkly.* 2021 Dec 3;3(49):1049–51.
- 537 44. Huddleston J, Hadfield J, Sibley TR, Lee J, Fay K, Ilcisin M, et al. Augur: a bioinformatics  
538 toolkit for phylogenetic analyses of human pathogens. *J Open Source Softw.* 2021 Jan  
539 7;6(57):2906.
- 540 45. Altschul SF, Gish W, Miller W, Myers EW, Lipman DJ. Basic local alignment search tool.  
541 *J Mol Biol.* 1990 Oct 5;215(3):403–10.

- 542 46. Katoh K, Standley DM. MAFFT Multiple Sequence Alignment Software Version 7:  
543 Improvements in Performance and Usability. *Mol Biol Evol.* 2013 Apr 1;30(4):772–80.
- 544 47. Minh BQ, Schmidt HA, Chernomor O, Schrempf D, Woodhams MD, von Haeseler A, et al.  
545 IQ-TREE 2: New Models and Efficient Methods for Phylogenetic Inference in the Genomic  
546 Era. *Mol Biol Evol.* 2020 May 1;37(5):1530–4.
- 547 48. Kalyaanamoorthy S, Minh BQ, Wong TKF, von Haeseler A, Jermini LS. ModelFinder: fast  
548 model selection for accurate phylogenetic estimates. *Nat Methods.* 2017 Jun;14(6):587–  
549 9.
- 550 49. Guindon S, Dufayard JF, Lefort V, Anisimova M, Hordijk W, Gascuel O. New Algorithms  
551 and Methods to Estimate Maximum-Likelihood Phylogenies: Assessing the Performance  
552 of PhyML 3.0. *Syst Biol.* 2010 May 1;59(3):307–21.
- 553 50. Letunic I, Bork P. Interactive Tree Of Life (iTOL): an online tool for phylogenetic tree  
554 display and annotation. *Bioinforma Oxf Engl.* 2007 Jan 1;23(1):127–8.
- 555 51. Rambaut A, Lam TT, Max Carvalho L, Pybus OG. Exploring the temporal structure of  
556 heterochronous sequences using TempEst (formerly Path-O-Gen). *Virus Evol.* 2016 Jan  
557 1;2(1):vew007.
- 558 52. Sagulenko P, Puller V, Neher RA. TreeTime: Maximum-likelihood phylodynamic analysis.  
559 *Virus Evol.* 2018 Jan 1;4(1):vex042.
- 560 53. Morel B, Barbera P, Czech L, Bettisworth B, Hübner L, Lutteropp S, et al. Phylogenetic  
561 Analysis of SARS-CoV-2 Data Is Difficult. *Mol Biol Evol.* 2021 May 4;38(5):1777–91.
- 562 54. Hill V, Ruis C, Bajaj S, Pybus OG, Kraemer MUG. Progress and challenges in virus  
563 genomic epidemiology. *Trends Parasitol.* 2021 Dec 1;37(12):1038–49.
- 564 55. Mir D, Rego N, Resende PC, Tort F, Fernández-Calero T, Noya V, et al. Recurrent  
565 Dissemination of SARS-CoV-2 Through the Uruguayan–Brazilian Border. *Front Microbiol*  
566 [Internet]. 2021 May 28 [cited 2024 Apr 22];12. Available from:  
567 <https://www.frontiersin.org/journals/microbiology/articles/10.3389/fmicb.2021.653986/full>
- 568 56. Ferrareze PAG, Cybis GB, de Oliveira LFB, Zimerman RA, Schiavon DEB, Peter C, et al.  
569 Intense P.1 (Gamma) diversification followed by rapid Delta substitution in Southern  
570 Brazil: a SARS-CoV-2 genomic epidemiology study. *Microbes Infect.* 2024 Jan  
571 1;26(1):105216.
- 572 57. Y Castro TR, Piccoli BC, Vieira AA, Casarin BC, Tessele LF, Salvato RS, et al.  
573 Introduction, Dispersal, and Predominance of SARS-CoV-2 Delta Variant in Rio Grande  
574 do Sul, Brazil: A Retrospective Analysis. *Microorganisms.* 2023 Dec 7;11(12):2938.
- 575 58. da Silva MS, Gularte JS, Filippi M, Demoliner M, Girardi V, Mosena ACS, et al. Genomic  
576 and epidemiologic surveillance of SARS-CoV-2 in Southern Brazil and identification of a  
577 new Omicron-L452R sublineage. *Virus Res.* 2022 Nov;321:198907.
- 578 59. Rhoden J, Hoffmann AT, Stein JF, da Silva MS, Gularte JS, Filippi M, et al. Diversity of  
579 Omicron sublineages and clinical characteristics in hospitalized patients in the  
580 southernmost state of Brazil. *BMC Infect Dis.* 2024 Feb 13;24(1):193.



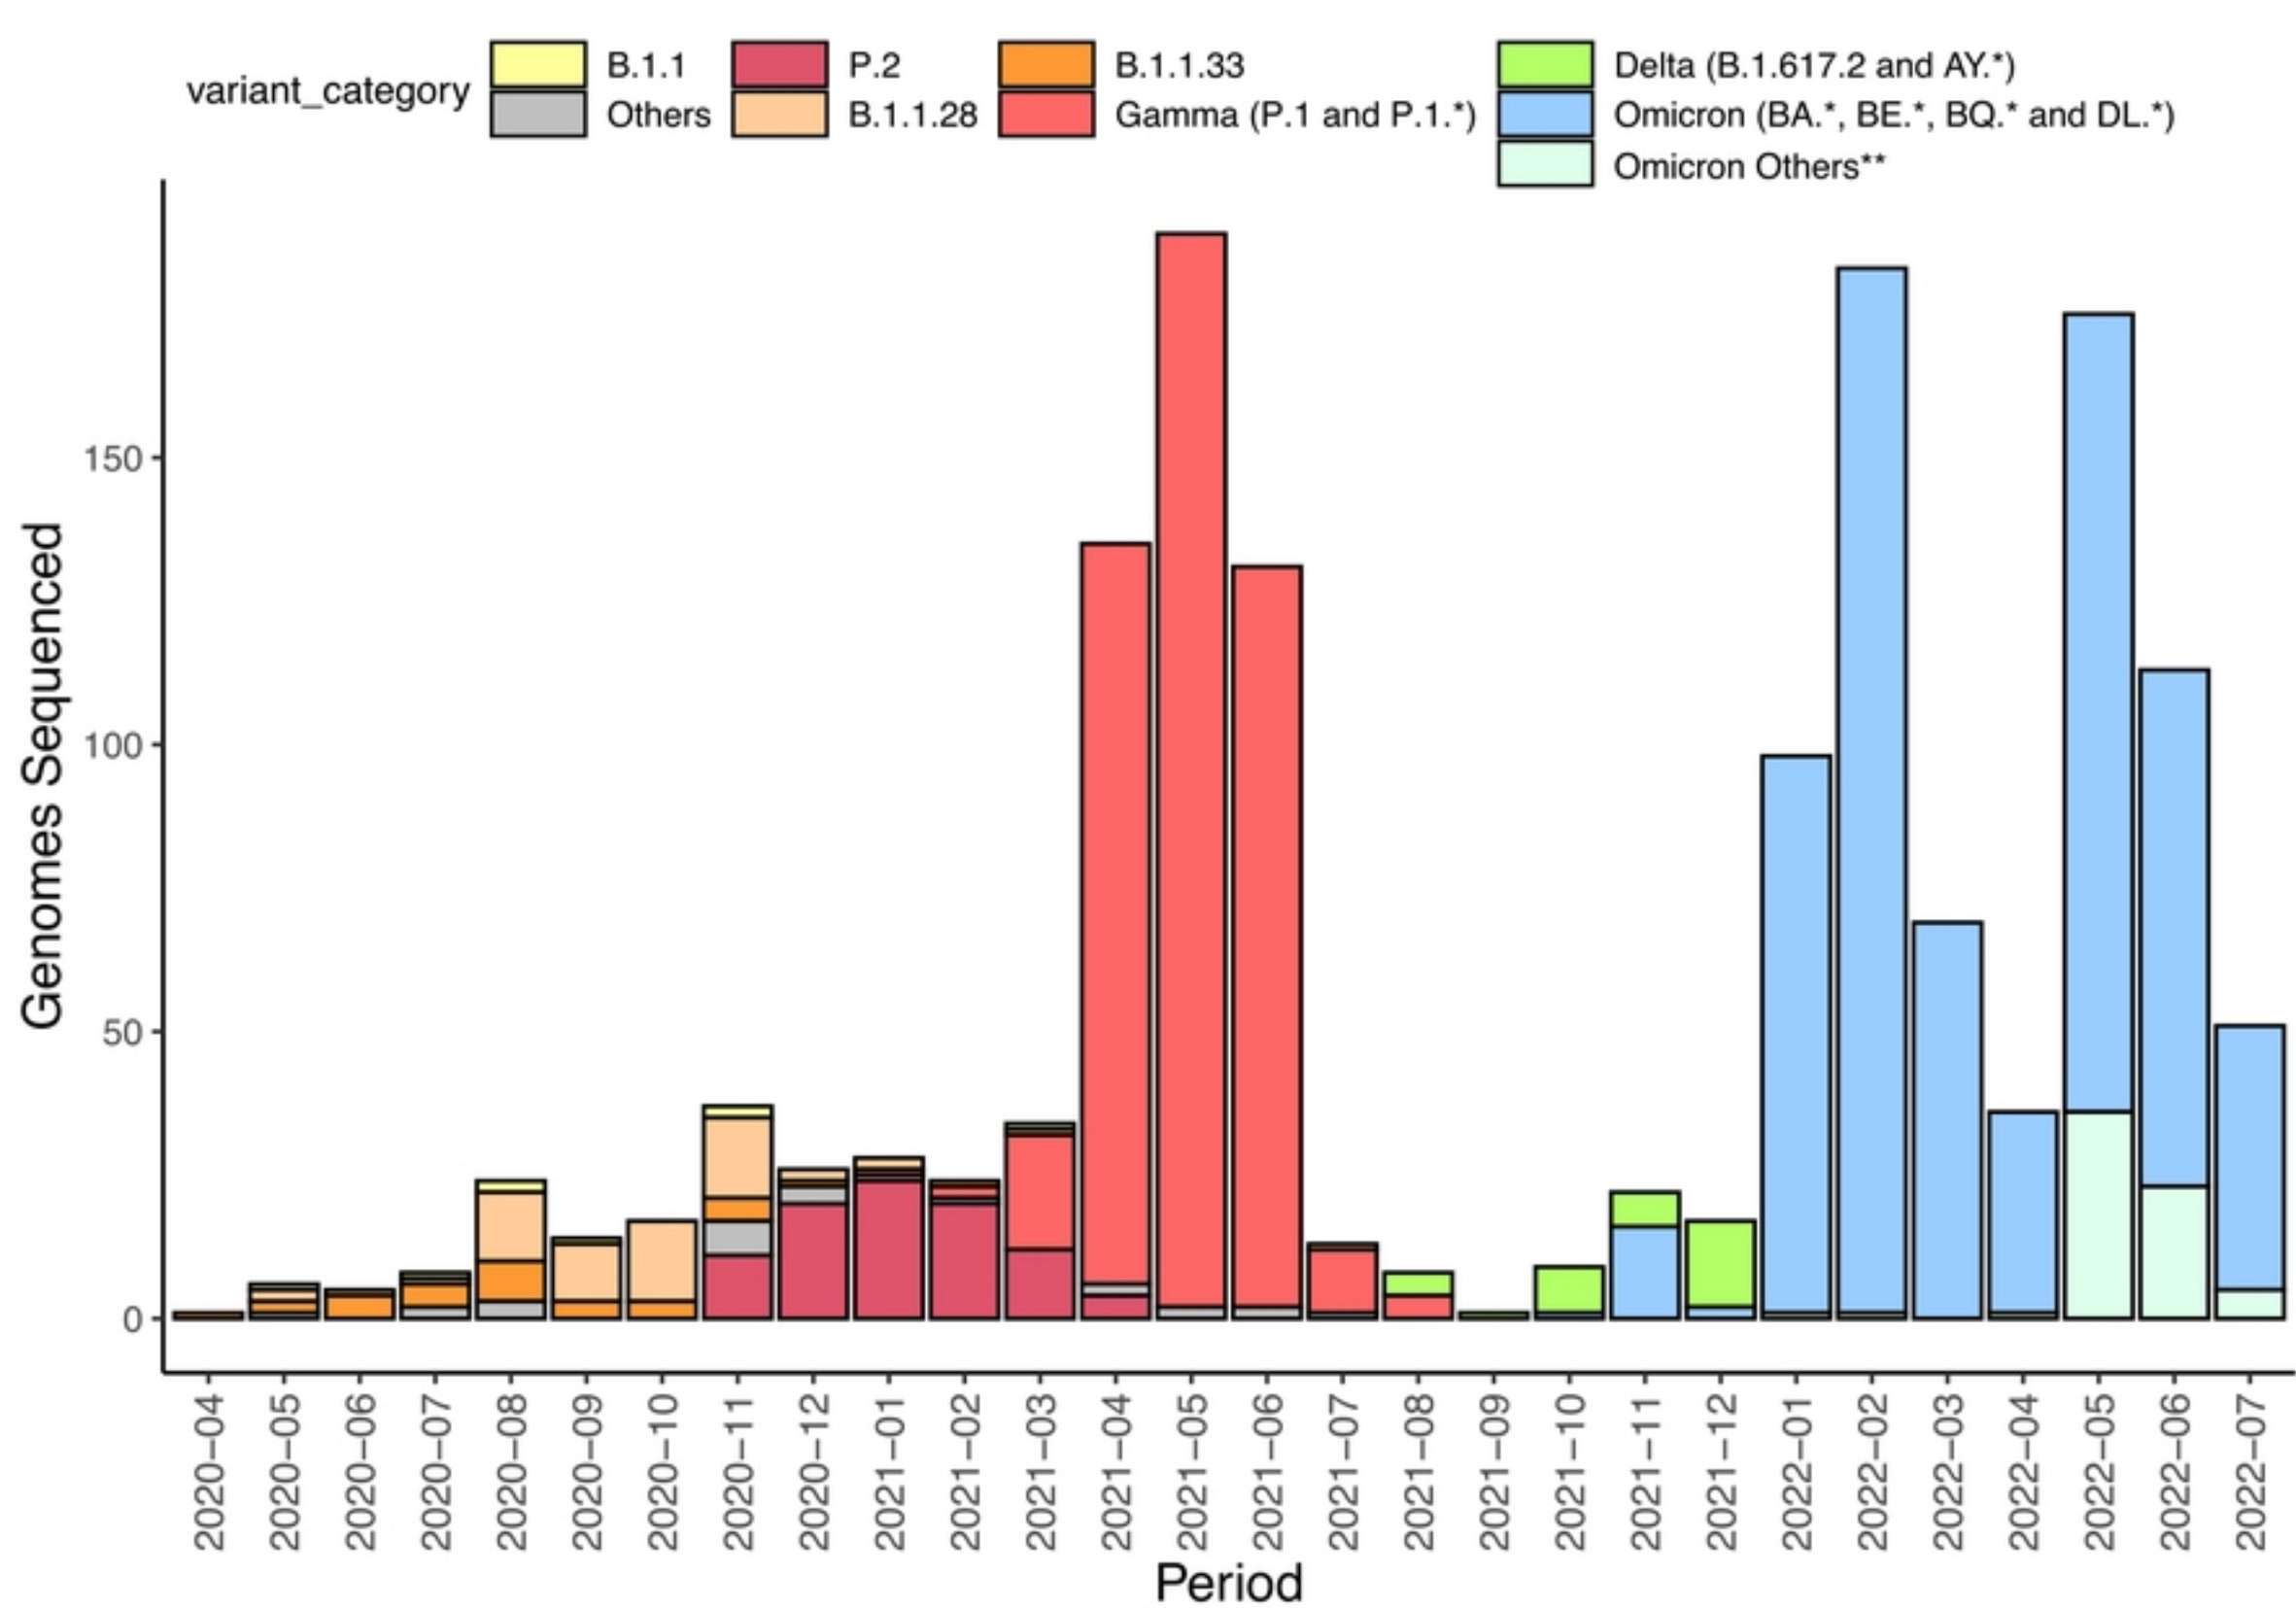

Figure 1

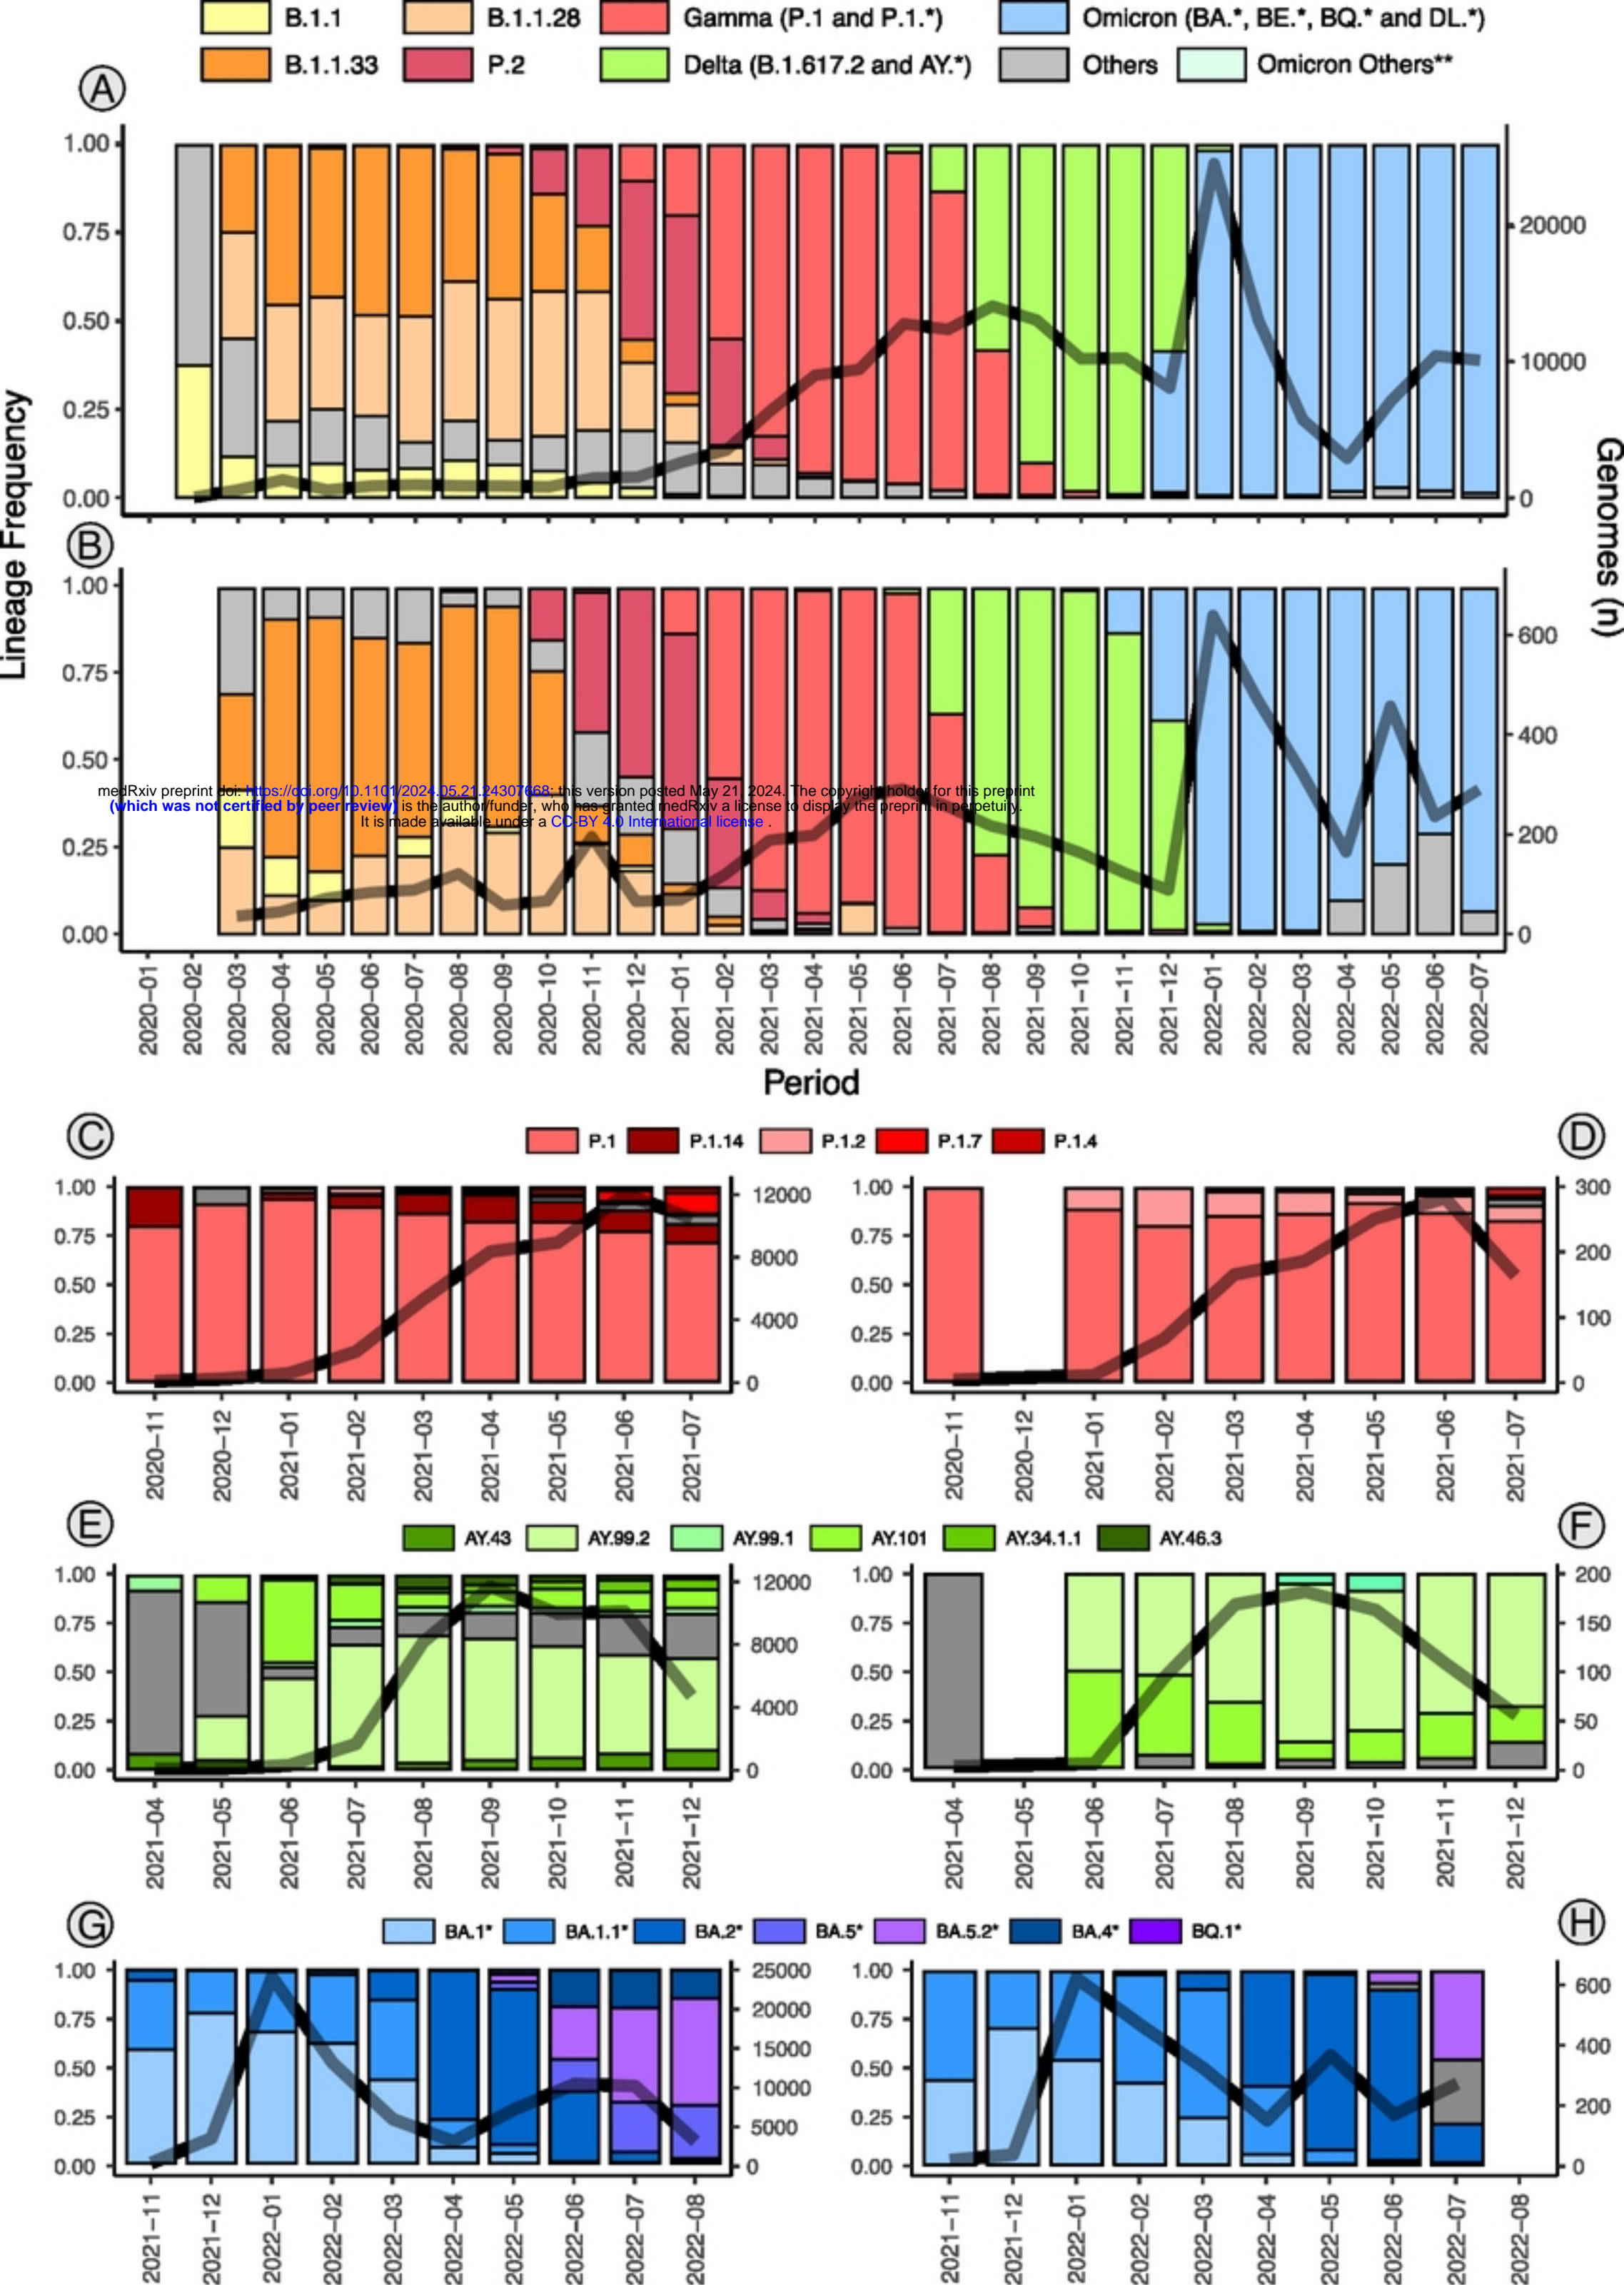

Figure 2

A

## Brazilian Regions Tip Colors

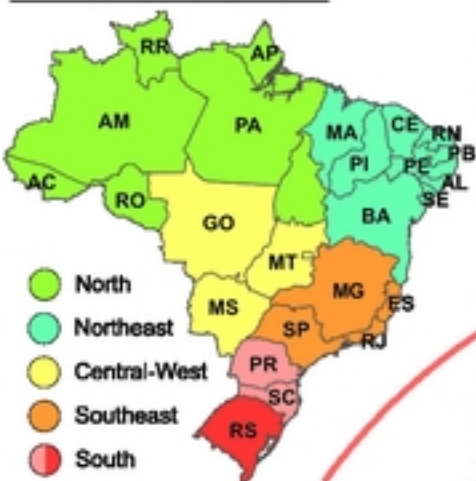

## Countries Tip Colors

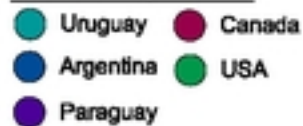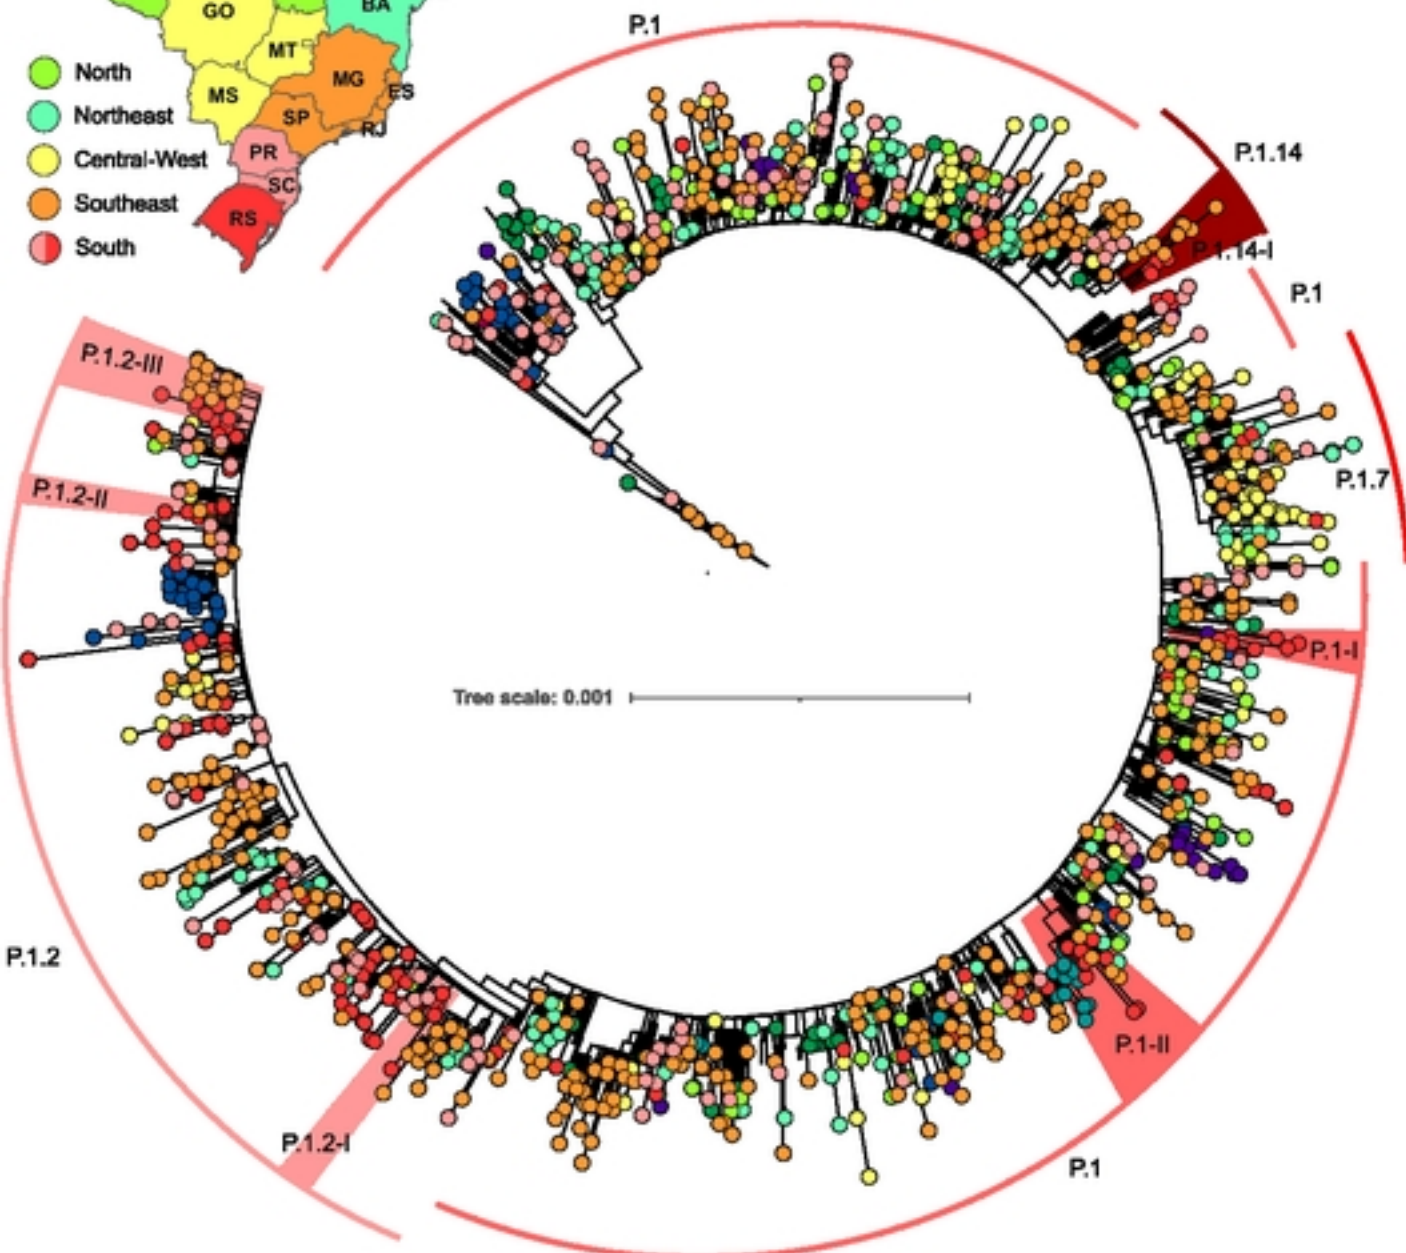

B

## P.1-14-I

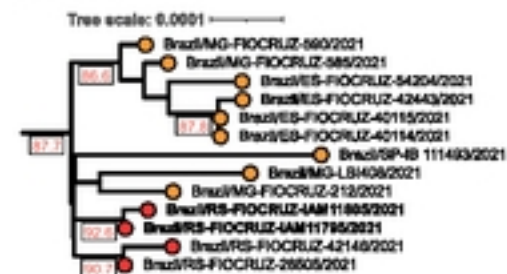

## P.1.2-I

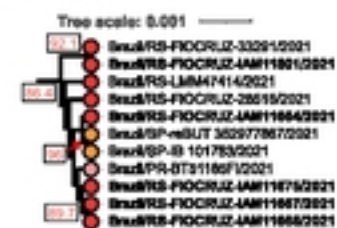

## P.1-I

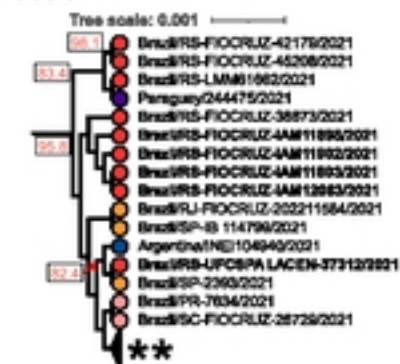

## P.1.2-II

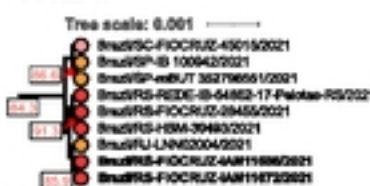

## P.1.2-III

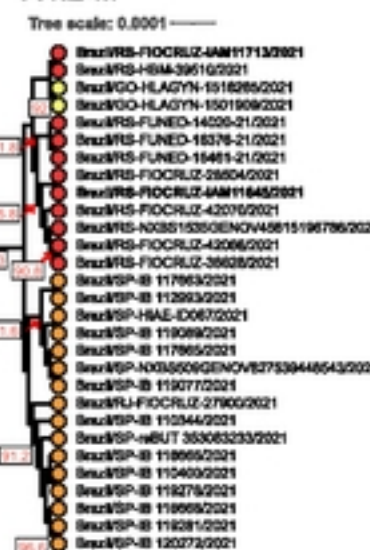

## P.1-II

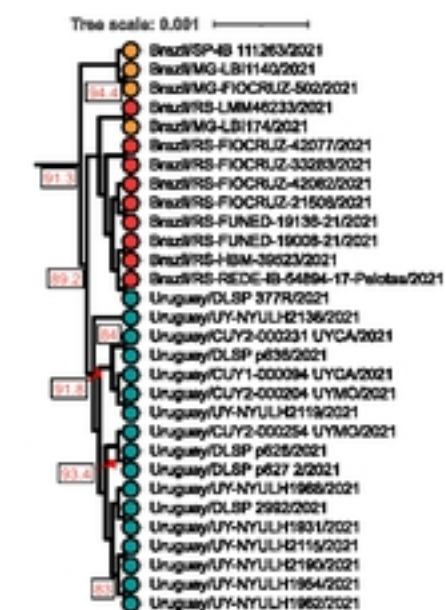

Figure 3

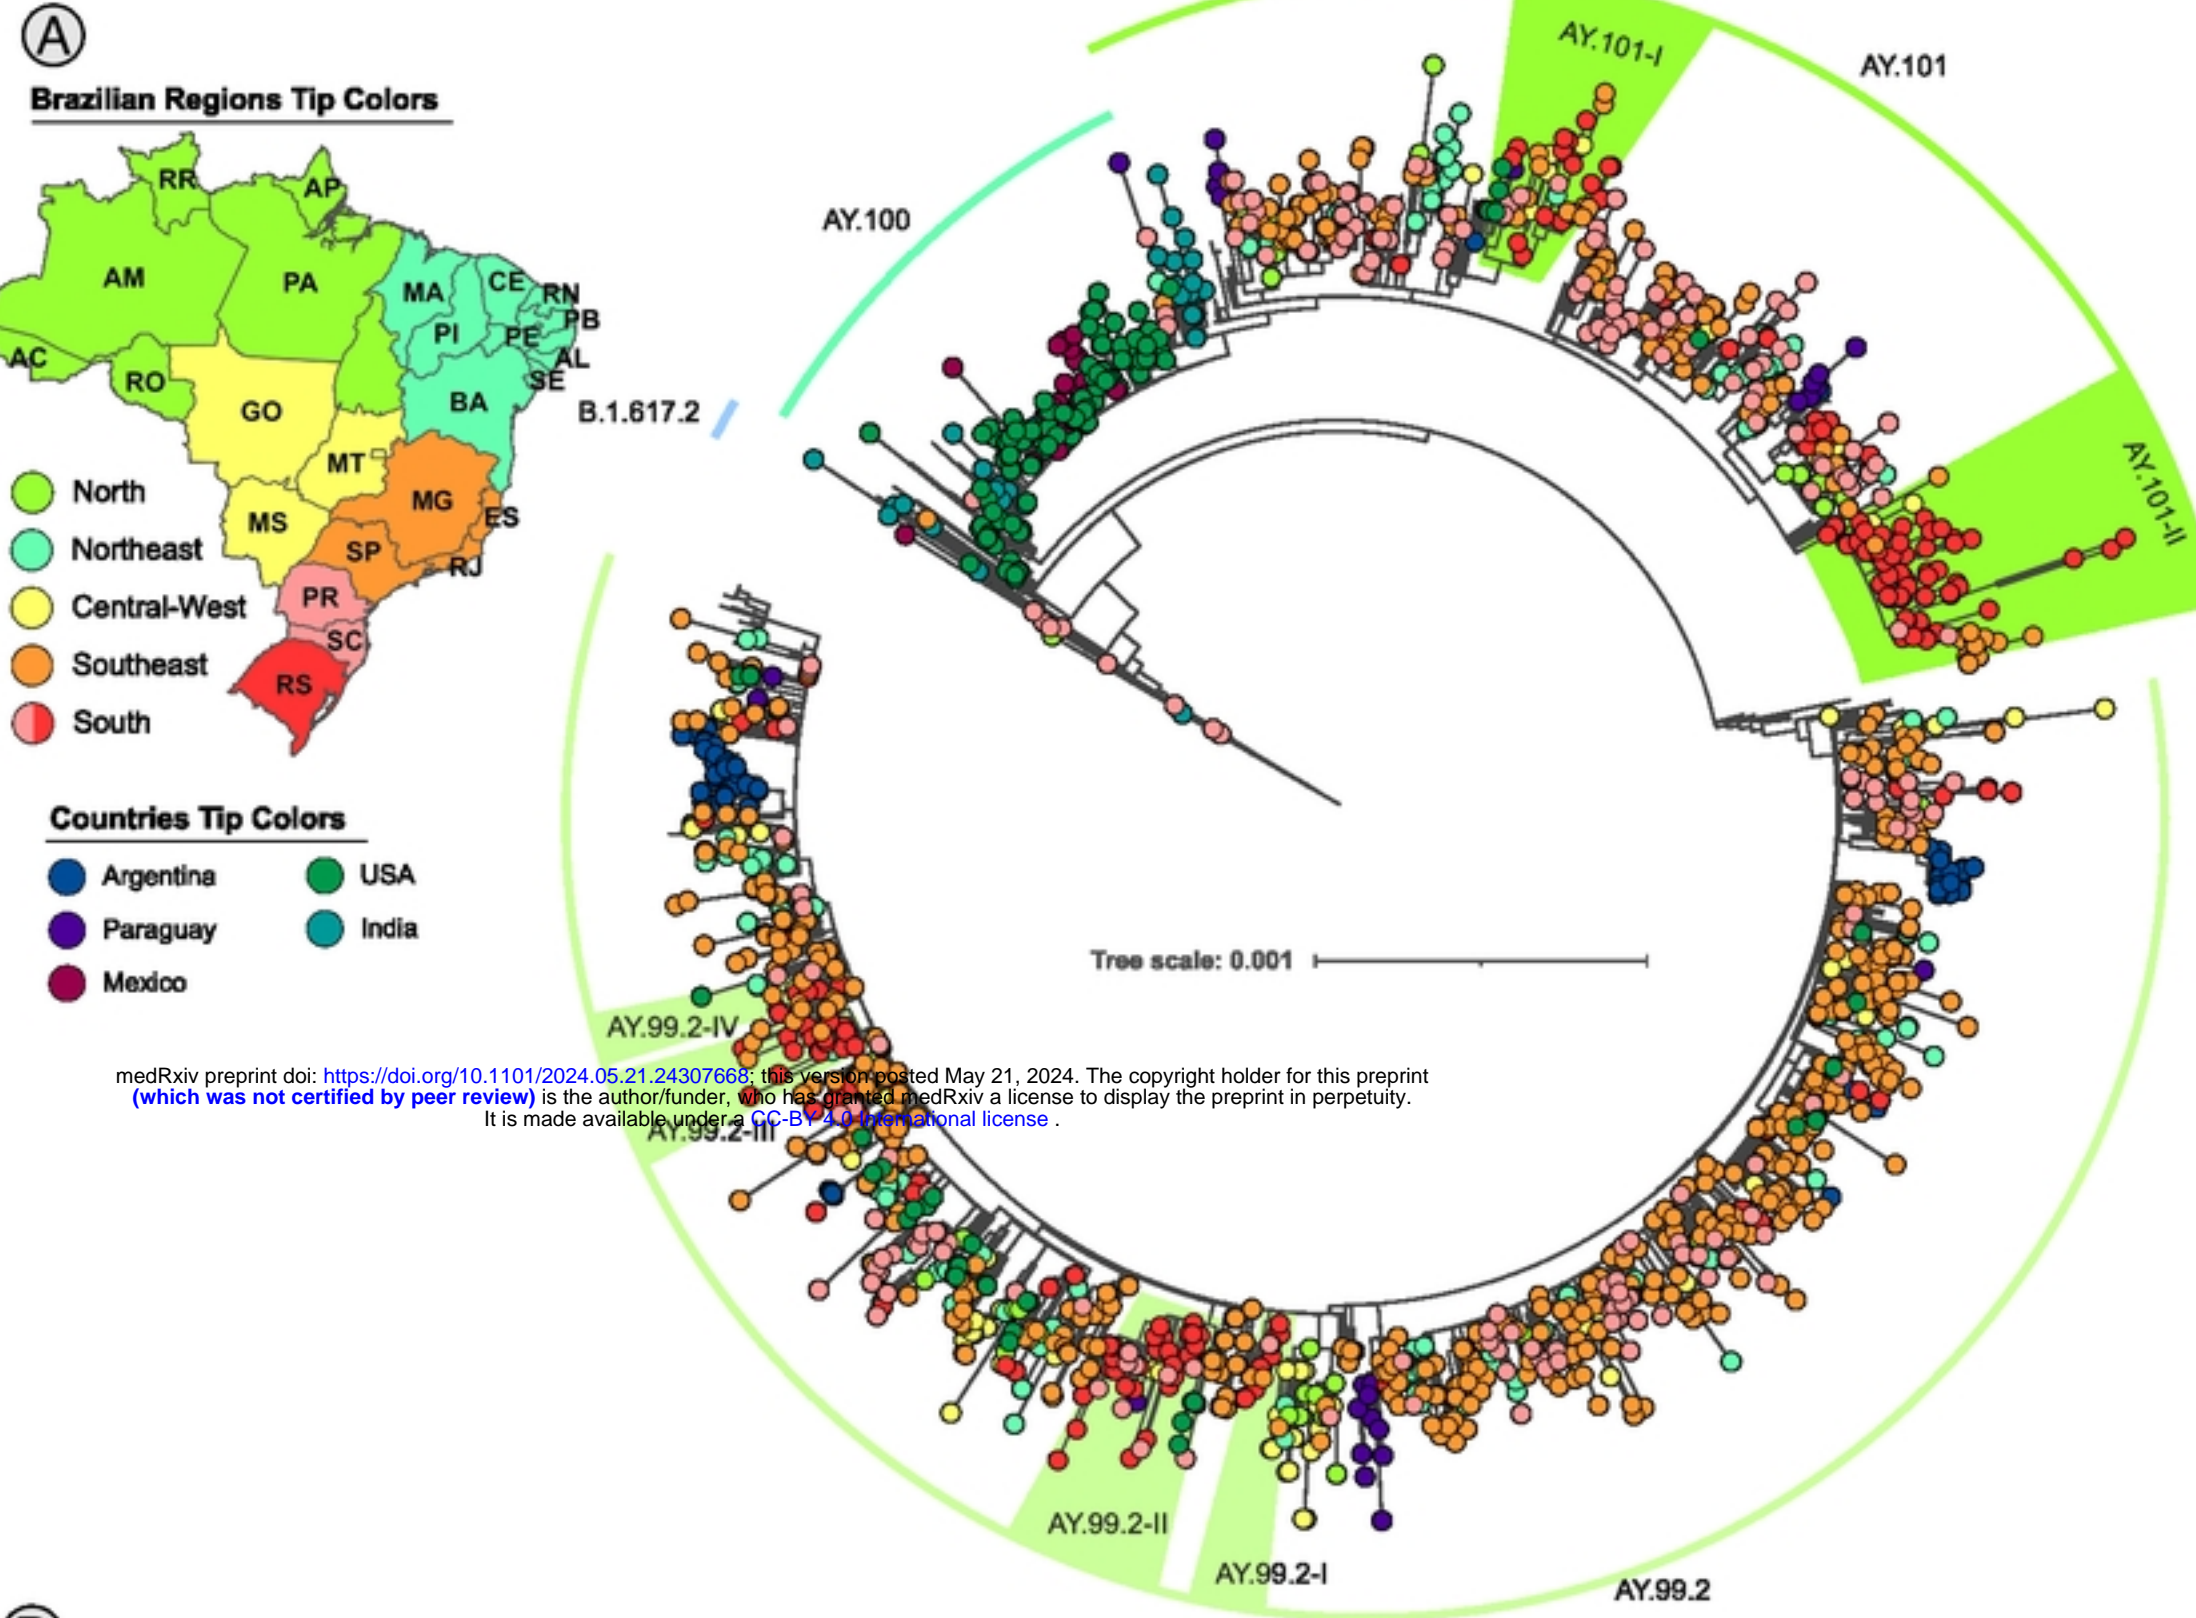

medRxiv preprint doi: <https://doi.org/10.1101/2024.05.21.24307668>; this version posted May 21, 2024. The copyright holder for this preprint (which was not certified by peer review) is the author/funder, who has granted medRxiv a license to display the preprint in perpetuity. It is made available under a [CC-BY 4.0 International license](https://creativecommons.org/licenses/by/4.0/).

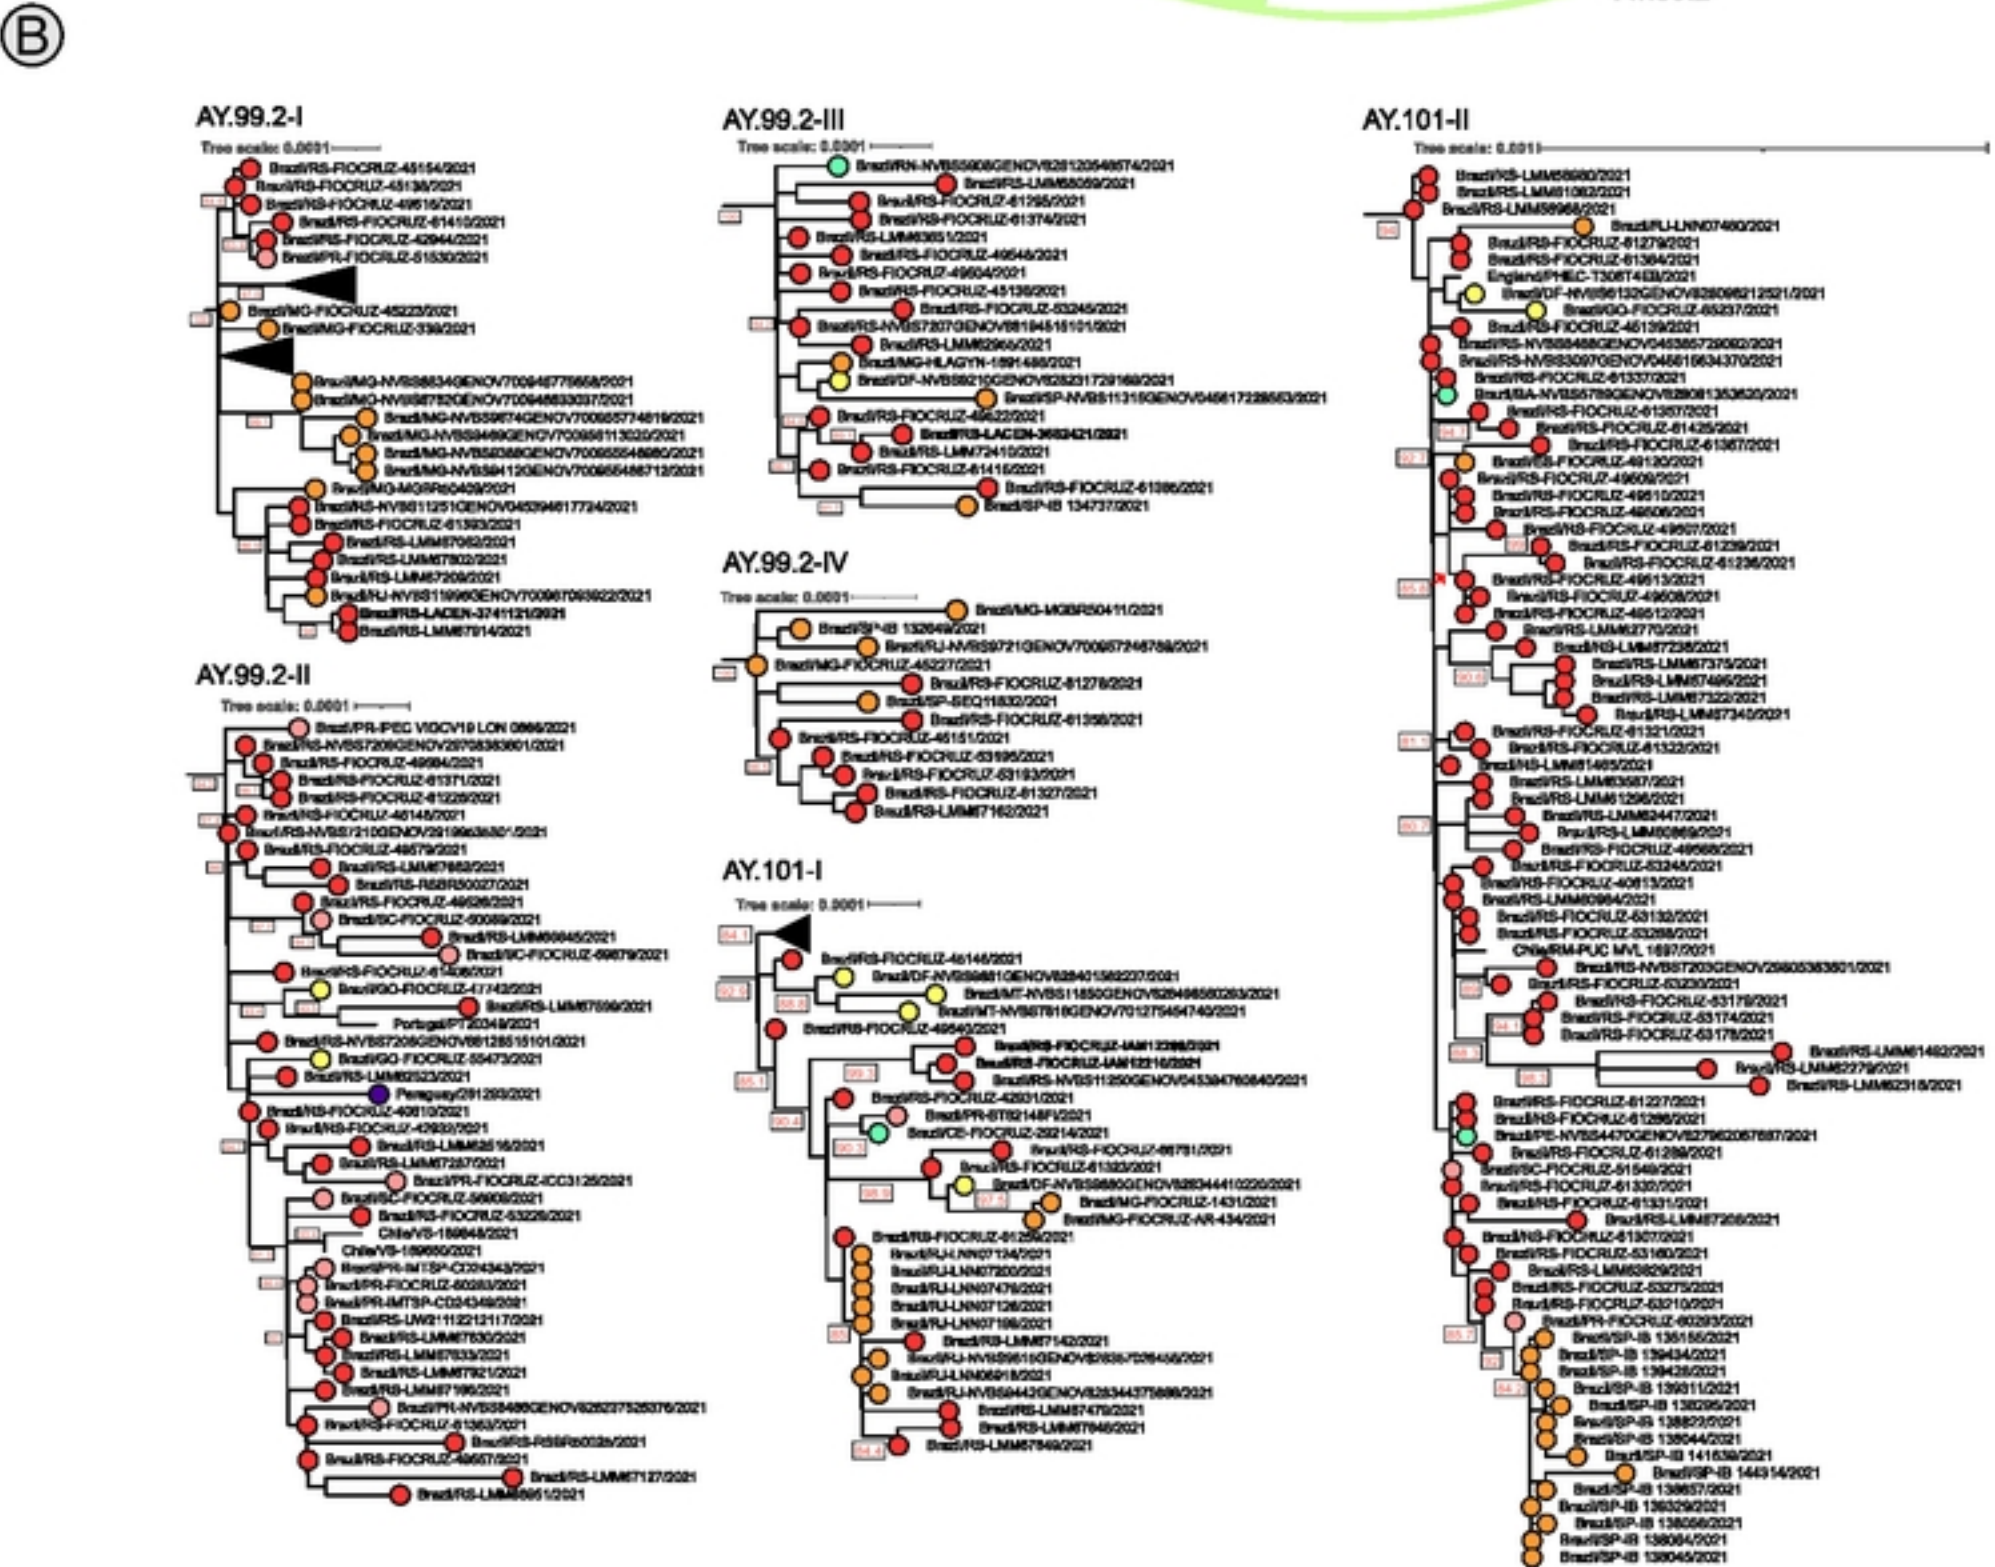

Figure 4

A

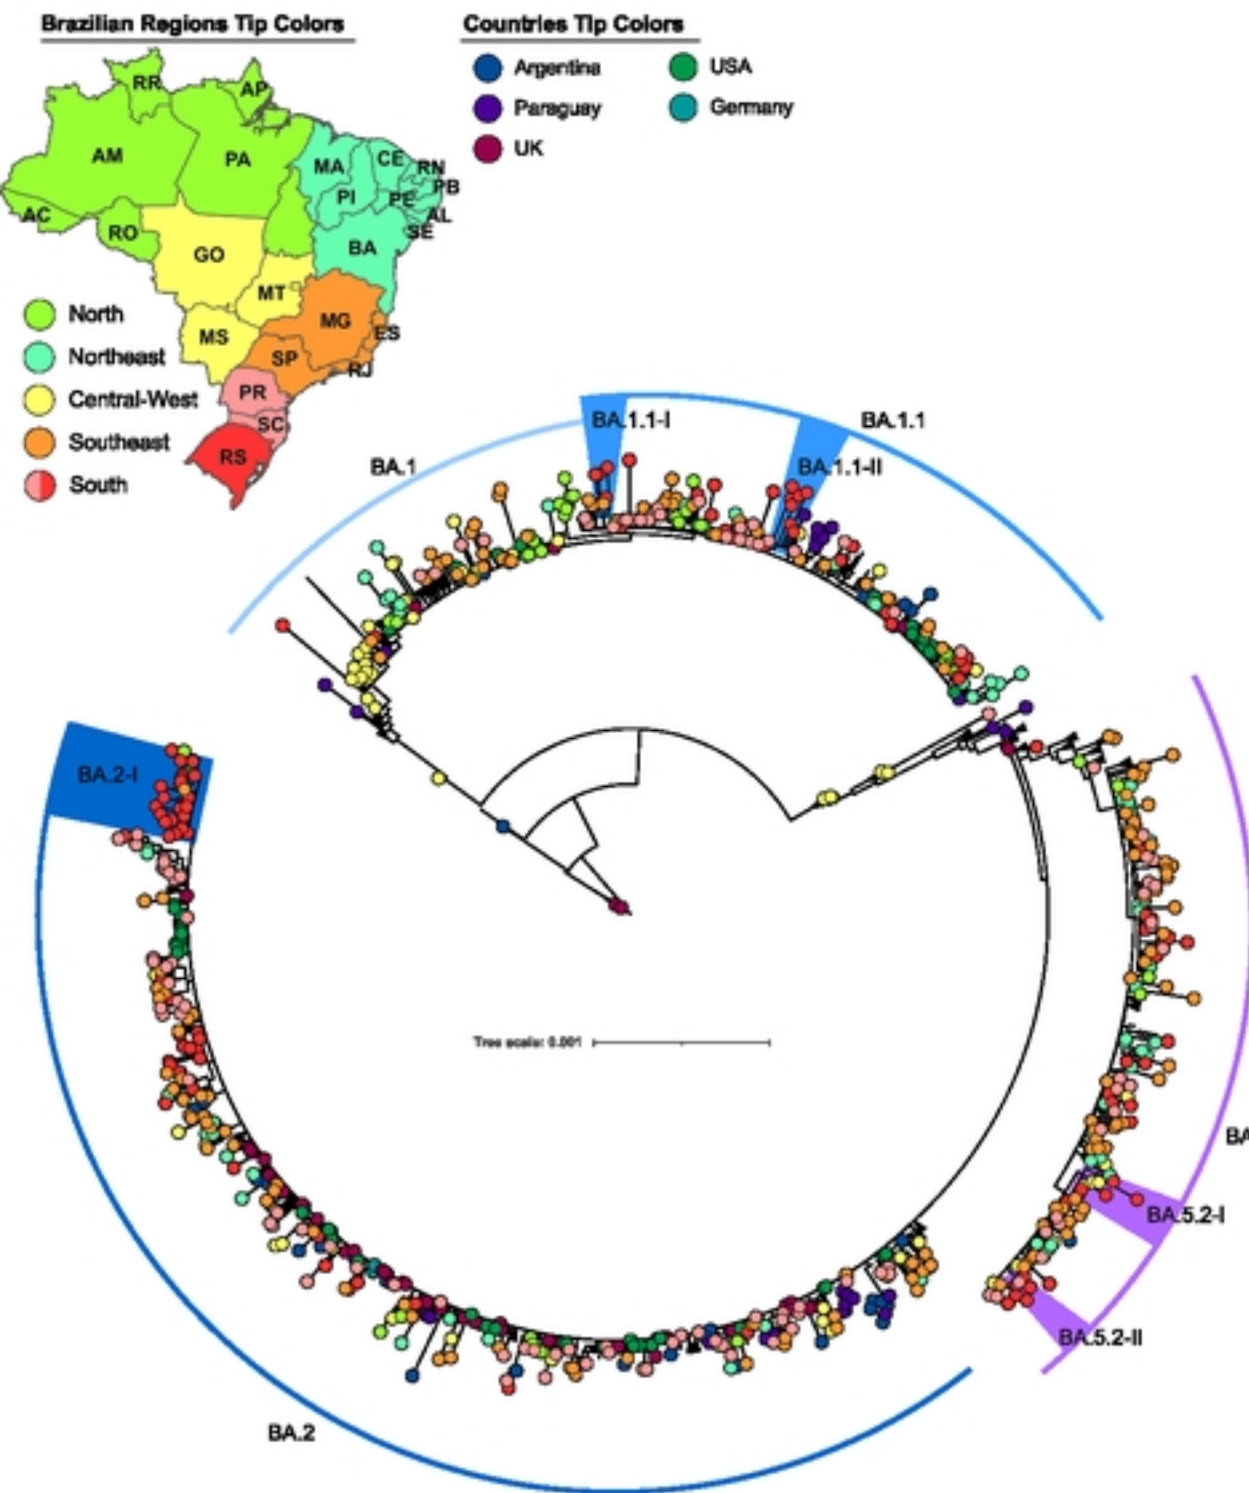

B

BA.1.1-

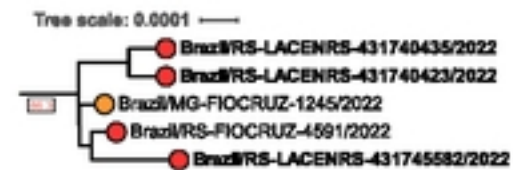

BA.1.1-I

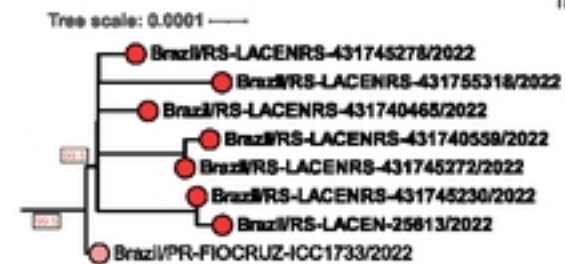

BA.5.2-I

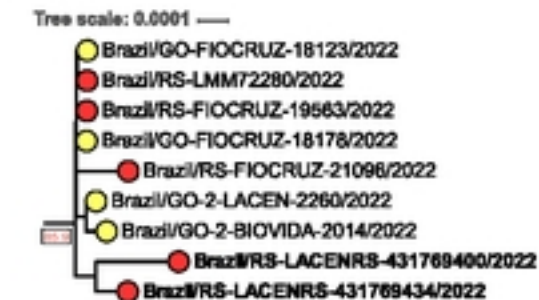

BA.5.2-II

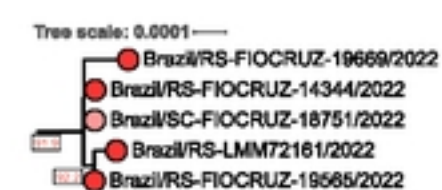

BA.2-I

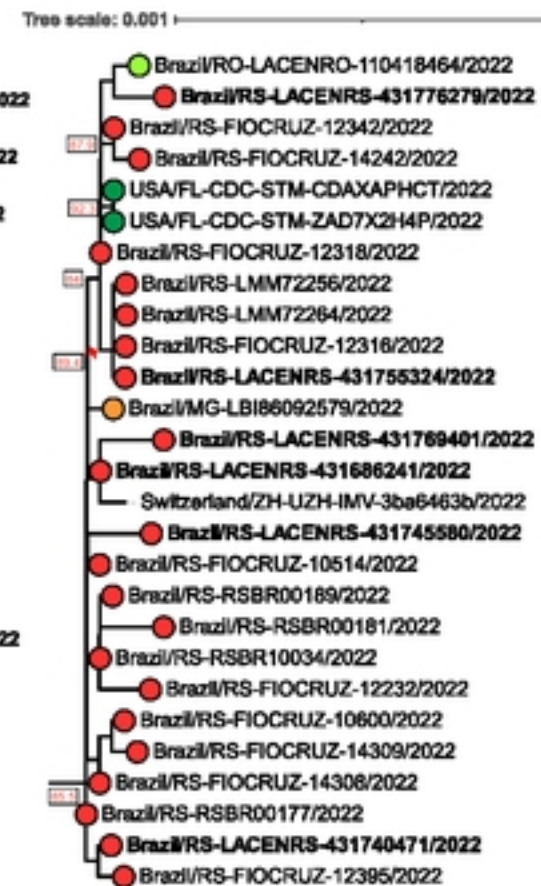

Figure 5
